# Supplementary material for: Specificity and Promiscuity at the Branch Point in Gentamicin Biosynthesis
Source: PubMed Central journal article supplement (PMC4039129; doi:10.1016/j.chembiol.2014.03.005), 2014-05-22
Supplement: mmc1.pdf [file mmc1.pdf]

**Chemistry & Biology, Volume 21**

**Supplemental Information**

**Specificity and Promiscuity at the Branch Point**

**in Gentamicin Biosynthesis**

**Junhong Guo, Fanglu Huang, Chuan Huang, Xiaobo Duan, Xinyun Jian, Finian Leeper,  
Zixin Deng, Peter F. Leadlay, and Yuhui Sun**

## SUPPLEMENTAL INFORMATION

### Inventory of Supplemental Information

- Figure S1 Sequence alignment of GenK and GenQ with their homologs in other aminoglycoside biosynthetic pathways, related to Figure 2
- Figure S2 Schematic representation and confirmation of in-frame deletion of *genK* and *genQ*, and complementation of  $\Delta$ genK and  $\Delta$ genQ related to Figure 2
- Figure S3 LC-HRMS analysis of production of gentamicin C complex and intermediates by the wild type,  $\Delta$ genK,  $\Delta$ genQ, and  $\Delta$ genQ $\Delta$ genK mutants of *M. echinospora* ATCC15835, related to Figure 2
- Figure S4 (A) Sequence alignment of GenB1, GenB2, GenB3 and GenB4 with their homolog Neo18 from neomycin biosynthetic pathway; (B) Schematic representation and confirmation of in-frame deletion of *genB1*, *genB2*, *genB3* and *genB4*, related to Figure 3
- Figure S5 Confirmation of C2a production in  $\Delta$ genB2 and  $\Delta$ genB2 $\Delta$ genB1 mutants, related to Figure 3
- Figure S6 Cloning and characterization of GenQ, GenB1, GenB2, GenB3 and GenB4. (A) Cloning of *genQ* with alternative start codon; (B) SDS-PAGE gel of VM\_GenQ and GenB; (C) UV-Vis. Spectra of VM\_GenQ and FAD; (D) UV-Vis spectra of GenB, related to Figures 4, 5 and 6
- Figure S7 LC-MS analysis of activity assays of GenB1, GenB2, GenB3 and GenB4, related to Figures 4 and 5
- List of oligonucleotide primers used in this study, related to Experimental Procedures
- Table S1 LC-HRMS analysis of gentamicin C complex and intermediates production by the wild type and *genB* mutants of *M. echinospora* ATCC15835, related to Figure 3
- Table S2 Plasmids used in this study, related to Experimental Procedures
- Table S3 In-frame deletion mutants and complemented strains used in this study, related to Experimental Procedures

**Figure S1, related to Figure 2. Sequence alignment of GenK (A) with homologous radical SAM-dependent methyltransferases and of GenQ (B) with homologous oxidoreductases from other aminoglycoside biosynthetic pathways**

Black letters in gray boxes represent amino acid residues identical in all species, while white letters in gray boxes represent similar amino acid residues. The red box in **A** indicates the consensus CX<sub>3</sub>CX<sub>2</sub>C binding motif for the FeS cluster.

**A**

|       |     |                                                                                             |
|-------|-----|---------------------------------------------------------------------------------------------|
| GenK  | 1   | -----MNALVAAPSVTEGNQVKVFLVKPPIRGCMVEIGRHVPIGLAYVSSALRAAGHETEIFDS-----LAYTEDNHVVPDAEL        |
| ForK  | 1   | -----MSTRTD TG VTRVLLIKPPIRACMIEIGRHMP IGLAYLAAQLRNSGMEVDIFDS-----LAF SEDNHVVP SQY          |
| Fom3  | 1   | -----MTIGSLGSTE FALHGKPAIRWGDLPQRVGGKASRRYQKVL LNP SATLFRHDLPRCTYPLGLGYIAAVLEKYDYEVVKIL     |
| GenD1 | 1   | MTVTNKIVTGVAFPPSLLAETPPISVATLTAYLRDKGMPAVGLDLNADFNEYLLNRVEIEQVQGPENTHEFTKPF IKQDFLNIITGNYTE |
| GenK  | 84  | RHPR--WRHIDHIG-----ARTERTEAATAAS-----EADVVGISCFPTPYYESAYELARAKRVLN                          |
| ForK  | 78  | AHPR--WDHLVHIG-----ADWARVEQVRR-----GYD VVGVSCFPTPYEPAYELGR AKQILPQ                          |
| Fom3  | 89  | AQPVDGDEQFLRIG-----LSDDDIVKVIKEF-----APDVI GISSFNSQADNVHLLK ADLVAPE                         |
| GenD1 | 101 | QQCQVAPESLSLIDPPFPFSYCEFLSILRDEPERVAKLRDPPDANIYHAFYQEKVAGKASELGLHGFSLIGYNQVIPALTLGYMKKENED  |
| GenK  | 149 | GTVAFFHVIE-----VPEVDAMICEAEVTVALLDAFATGRPLTEILG-----VAFRCGEG-----LCECATPGTPHIR----          |
| ForK  | 142 | PTVAHPHATA-----EEAFDAVVICAEANVVEIVLAAGRSLRGLPG-----LTFRCGTG-----LCD CPRPSGVHLQ----          |
| Fom3  | 156 | ARYFPKACID-----DPNLDAVVICGEMTFLWLPHLNGNVREDEVHG-----LAWRDRDGKI QIKPELPLISSMRPEGPEQGK----    |
| GenD1 | 201 | VTSEADMLIPRLEACEPELGELIDAVVREGEPELAKMAEALSRGERPVGIPGGCKPMSEQSVLDTKPVGRKLLAMSQPRENMPNTHWRIE  |
| GenK  | 216 | APFVADLDSAPFAADQLDFDRYGNAVT-----LITSRGCP-FSCSFCVHATVG-KQFRARDPQRVDEDEHYVNVHGVRRF            |
| ForK  | 209 | AEFLQDLDCALBAVDLLMGSYDETAT-----LITSRGCP-FSCSFCVHATVG-KKFRARAPENVDEDEHYVTEHGIRRF             |
| Fom3  | 235 | LSMAGELDHPPFAWHYMEKYFEIKAYQSPYTVGSRVQGLYTSRGCT-ANCTFCITTFHWG-QKLRRSVDNVVNEFLRLRDEYGDDEF     |
| GenD1 | 301 | ISWVADMHQPTFDYSDFL SLYTTFRE-----GQGSVLVQGSRSQYMKCSFCNAITNFAPWSYREKSTENIQKIDTFLELM-PGTV      |
| GenK  | 301 | DIERVHATCQEI VRRKLDVRLSLPNGMTVVKITDLESVVSIGFDDIFLGETTDAARLRKRRKGFTS DKVSAGVALFEKGLTASAAI    |
| ForK  | 294 | DIARVHEICRAITRRGLDVLEHL PNGMTVVKIDPLVDDMAAGFQSIFLGETTDVKRLRQRRKGFTS DEKVNAGAGLFDHGITVGSAL   |
| Fom3  | 333 | DMDHARELFRAFK--EVGLPWATPQGTALWRDDEL DLMAESGAYQVFAAESGVQRVLKDIKKPLNIGRTSHLIKYARSLGMHVHGFF    |
| GenD1 | 393 | PAKRLVELADFFIAKKRPELFWVDVRFEGNIDAVLTKMRDS-QGTRFGLETANERLLDLRRKGNR-DEVVHRLLD SRELGYKPFIMT    |
| GenK  | 399 | SLDAIVQDAVNLVLGVEW TNPFPYIYGSPDYQTC LTRGIVDPLTDPALFDQ-FNFAFANGVLAAD ELYTAWVGTLAWALWPKYVLEGA |
| ForK  | 392 | TPAEVARDSNLMLAGIRW TNPFPYIPGSPDFQQCLANGLITHDTLALYDQ-FNFAIGSDHLSPEALYWSVVITQAWAHWPDYVLEGA    |
| Fom3  | 427 | PMFNGAGESHEEMQASYDAE-----ESGFSSASFFFAASPIVGSSEL-LRECI RQGFVDP-EESLYRMTYKQCHINVPGLWDGE       |
| GenD1 | 491 | EEAEELYQFLSDYHDVTYQIADFIVERNSEPIQLRPDDYGIHIDDEQESFHNNLHFTRRAGYSDEEAQEVYRDLVVRTQRFKGAHEVDV   |
| GenK  | 496 | SAAVAGARLVEHSMQLDPESPEELPATVRAIRESADGLLALGHPLGCVCMQHVAADADKAGADQFCRFAGDMIAAAIALYSGQPQVSAQ   |
| ForK  | 490 | GLDVALQRLLAHSDSLFGNGELEVPAVP--GRSTATSCTATRRLPRGAAHQPAATARRGLHLHR                            |
| Fom3  | 503 | -IADLAAKFNRFNRRDRD-----YTPQKQWNAQY-----                                                     |
| GenD1 | 589 | APDLSVYRLSLRAGSFALENYVVKHNNLPFEGLVPIGYKVVQQTWDMTDKGTVFEIDPDIALGALAGAGSR-----                |
| GenK  | 596 | EGCSFMVRPTGDERIGRIQRRFVELLDENRREAELVTAEAVSH                                                 |
| ForK  | 553 | -----                                                                                       |
| Fom3  | 534 | -----                                                                                       |
| GenD1 | 659 | -----                                                                                       |

ForK (accession no. CAF31547.1): from *Micromonospora olivasterospora*;

Fom3 (accession no. ACG70826.1): from *Streptomyces fradiae*;

GenD1 (accession no. CAF31434.1): from *Micromonospora echinospora*.

**B**

|       |     |                                                                                              |
|-------|-----|----------------------------------------------------------------------------------------------|
| GenQ  | 1   | -----MTGSGASCAITAWALQRAGLDVVVVEQGPFVDPWVSYDDETVAETAWIR                                       |
| ForQ  | 1   | -----MTTSDARYGPEPTD-----GDVRYEYDVCVVGGGARCAITAWALLSRAGLSVAVVVEQGGHVTADTSDYDILLAAESAWVR       |
| Neo11 | 1   | MKRLRGITLPSDARHAWHPEPLGPAHRDGDWTRDDDRVWVWVVTGSGASCSVAADRIVRQGLDVLVMEEGFRISPDLGNEPLDDMCRTALAR |
| LivQ  | 1   | MERLRGFSPLENTTARHPAPLGAHRDGLPEGTADRVWVVCVTGSGASCSVAADRIVRQGLDVLVMEEGFRISPDLGNEPLDDMCRTALAR   |
| BtrQ  | 1   | -----MSHAEKAYAR                                                                              |
| KanI  | 1   | -----MRIISVQEAARTFDVVCVVGGSGASCAITAAVLAERGLSVLILEQGTATPPGTDHDDVEDPDTHAYAR                    |
| TobQ  | 1   | -----MLLISADEAARRTYDACVVVGGSGASCSVAAAVLAERGLSVLIVVEQGGPFPAGADVEDHEDPDGWAFAAR                 |
| GenQ  | 60  | GNPWSTCNVGGGTVFYGGAAFRYRPVDFDAESRGRSDLPLRNPWVDFLDFYYEYFELALGTSG--GGHDPISLPS--NPSYMPRPVETTAEG |
| ForQ  | 85  | GSPWTTCNVGGGTVFYGGVLPFRHRPIDFDPERVGGQADLPLRNPWDFDLEFYTAVEDIIGVAGLAGADPGIPARSAPIPARAGAHLAG    |
| Neo11 | 101 | GWPWTTSNLGGGTVFYGGASRYRPFDFDPSELVDAGGLDVRWPYGLAFLAPYYDVLERRLGVCG--GEE-----GEGSRGPAHPPTAA     |
| LivQ  | 101 | GWPWTTSNLGGGTVFYGGASRYRPFDFDPSELVDAGGLDVRWPYGLAFLAPYYDVLERRLGVCG--GDAPGIHR--GSRHSRGAHPQPSA   |
| BtrQ  | 20  | GYPWASAVGGGTFYAGISRYRQVDFDAREYASDALDPWPIGYSLLDFYYNKTEQWLGVSGDLNADPFKNS--AGTGLRTHAHSYSQQ      |
| KanI  | 76  | GYPWASAVGGGTVFYGGISRYEQDLDPPPALGDADYAHWRLRLDLEEHYDWVEDRLGVSG--PSHGRVGYAFPHYARGSLPHTPM        |
| TobQ  | 76  | GFPWTAMAAGGGTVFYAGISRYRQDLDLAPPSSLLGEADYDHWQVGLALEPHYEWTEYQLAVAG--PSRKRKVDYVFPVYHRPSLPTTFP   |
| GenQ  | 157 | SLGLNPFPTPLAATESYHGRLACAGERPCISNRCERGAAGDAITVFLDFE--ARKAGLRFAGLKAVRLLRRDATSVDDTECVRVNDGNRHV  |
| ForQ  | 185 | ALCWHFPTPLGLTDAYRHHGCVADAPCISRTCPVGAAGDAVNRFLTPE--ALRAGARFAGLKAVALLGDERHDARARCVRVDTGRWYE     |
| Neo11 | 192 | ALGYRFPPTPLANRHAHGGRSACERNLSVSHQCSGTAKGDAVAVFLAPLAHPNFTRTGVTAARLNQDRPDAVGSVTCODRLGRITHR      |
| LivQ  | 198 | SLCYRFPPTPLANRDPHGGRAAACARDSLCVSHLCPGTAKGDAVAVFLAPLAHPNFTRTGVTAARLEQDRSGEVAAVRCODRQGTQAHR    |
| BtrQ  | 119 | ELGLHFPTPLAINTDHNYPGCDNLSTCTDYACPIGAKADSFTRILKPVKLEHVTMKNTAFAFHQTDPSVDSLECDLDTKERH           |
| KanI  | 174 | ALGLTPLSTPLASGARDRHGPGCAELTPCTGFTCPVNAKADVSRILAR--AEGDVSALDTRARFVASAPGRAKRELVGGSPRSRS        |
| TobQ  | 174 | ALNLTPLTPEVALSGIRDRFGPGCAQATPCTSFSCPTGAADVSRVLAPE--AEGDVSALVHTVDRLVASGSHRVDAAEVDRGTGTRRT     |
| GenQ  | 256 | GNAVQSAALLLRSTDEASFGGNEHDLVGRGLCFKMSGYVLGYRRDTPVTPGGGRVAGPSPS--ATITDVTYADDAFGGEGVLEFSRP      |
| ForQ  | 284 | GNAVQSAALLLRSTTERHERGLGNSHDLVGRGLCFKLSYVLYGHRGSDEPPRS--EVMGLGPVSAATITDFYEDPAAGGGEGVLEFVVR    |
| Neo11 | 292 | CNAVQSAALLLRSGRGAEDGFGNHSGLVGRGLTKMLSEYVSVVDAPSAATLAD--WRAHAGPSTIAFLDLYLDADCEGEGGTYE SKN     |
| LivQ  | 298 | CNAVQSAALLLRSRTPYSEDGFGNHSHLVGRGLCKLSEYLSGTVDA--DPAVLAD--PYTNTGPPSVAFLDLYLDPDCGEGGGLIYESKR   |
| BtrQ  | 219 | GNAVQSAALVLRSTNKWEDGFGNKSGLVGSGLSFKNSEYVSVVDVMDHPEYQLNE---PLKGLYSVSTIDYQDPHCHSGEGGTYE ANP    |
| KanI  | 272 | ANAVQSAALLLRSDRREDFGFGNSGQVGRHLAMKNSVYVRRGTQERIVAHQPL----RHRYSVVCVLDLIRGAEFEGGGLIYES ANP     |
| TobQ  | 272 | ANAVQSAALLLRSTRLEDFGFGNGLVGRHLAMKNSVYVRRGVPVRRPLGYTPL----RHRYSVVCVLDLIRGEFEDGEGGGLIYES ANP   |
| GenQ  | 356 | EQ--IIRLECIYVDPQRAENRVTLGRVDQFQPDVVDYSPHERDRARLEYLQQAEGLRAAGCELTWRESYWMGSHLHGTCRAGT          |
| ForQ  | 383 | EQ--LLRIEALVDFEPQPTNRVRLGTGTDCHGVTDVVDYQAHPRDRARLEYLRRGEEELRAGCSVVVREPSSGELGSHLHGTCRMGT      |
| Neo11 | 391 | VL--ELRIETIADHEFLDNRVRLSSHADEGEPAAVVDYTPDPRDLRRLAYMTDVCERLRKAGATGIAHEESGAAQSSCHLHGTCRAGD     |
| LivQ  | 396 | AL--ELRIETIADHENLDRVGLSTHLEDEGEPAAVVDYTPDPRDLRRLAYMTGRCERLRKAGARGIRSRSTGAAQSSCHLHGTCRAGH     |
| BtrQ  | 316 | GM--YVQLECIHADQPMVTNRVRLSNDKATGVPKVDYQTHEWKKRLESMTEPAGELTAMGAKRVQCHPYSYLLGSAHLHGTCRAGT       |
| KanI  | 367 | GAGSLIQLECLIGDRFQARNRVRARSRRDGGQRVVDYRQHPLDGERLDVLQGAQDVLHAGARTESVDSATGSHLHGTLRAGD           |
| TobQ  | 367 | ERGTVLQVECLIGDRFQARNRVRLSRTRDRDFFRVLDYEPHADLRLAVLSEATDILTRGAIDVREVDVAELGSAHLHGTLSER          |
| GenQ  | 454 | DGRVHGLTNMVVDGGVMEYFGGVNPTLTIQALALRMAQDLRREFG-----IDPDFSL-----                               |
| ForQ  | 481 | NGRTHDADNYVADGALLEPQAVNP TLTIQAVLRVAQRVLVDRFGAPATPVGEVVSPPTVVVVPAQRSAPPATLPHG                |
| Neo11 | 489 | WGRVHSAPNYVVDGGFMEYFGGLNPTLTIQAHALRSKAVAGDLVS-----RHTAHV-----                                |
| LivQ  | 494 | WGRVHSADNYVVDGSMFMEYFGGLNPTLTIQAHALRSRAVASHLAA-----DRAAHV-----                               |
| BtrQ  | 414 | FGRFHTIDNLEAADGSFMEYFGGVNPTLTIQANALRIENMSV-----                                              |
| KanI  | 467 | TGRTHDYDNYVADGATFPEAGNFP TLTIQANARRIAVGTS-----                                               |
| TobQ  | 467 | FGRVHGYDNYVAVDGAATFPEAGNPNPTLTIQANARRIASAD-----                                              |

Neo11 (accession no. CAH58694.1): from *S. fradiae*;

BtrQ (accession no. BAE07079.1): from *Bacillus circulans*;

LivQ (accession no. CAG38701.1): from *S. lividus*;

KanI (accession no. CAF60534.1): from *S. kanamyceticus*;

TobQ (accession no. CAH18553.1): from *Streptoalloteichus tenebrarius*;

ForQ (accession no. CAF31536.1): from *M. olivasterospora*.

**Figure S2, related to Figure 2. In-frame deletion of *genK* and *genQ* in *M. echinospora* ATCC15835, and complementation of  $\Delta$ *genK* and  $\Delta$ *genQ***  
 (A) Schematic representation of the in-frame deletions; (B) Confirmation by Southern blot; (C) Confirmation by PCR. The arrows indicate the expected size of the PCR fragments in the wild type and mutants. The dash arrows show the location of PCR primers for check mutants.

**(1)  $\Delta$ *genK***

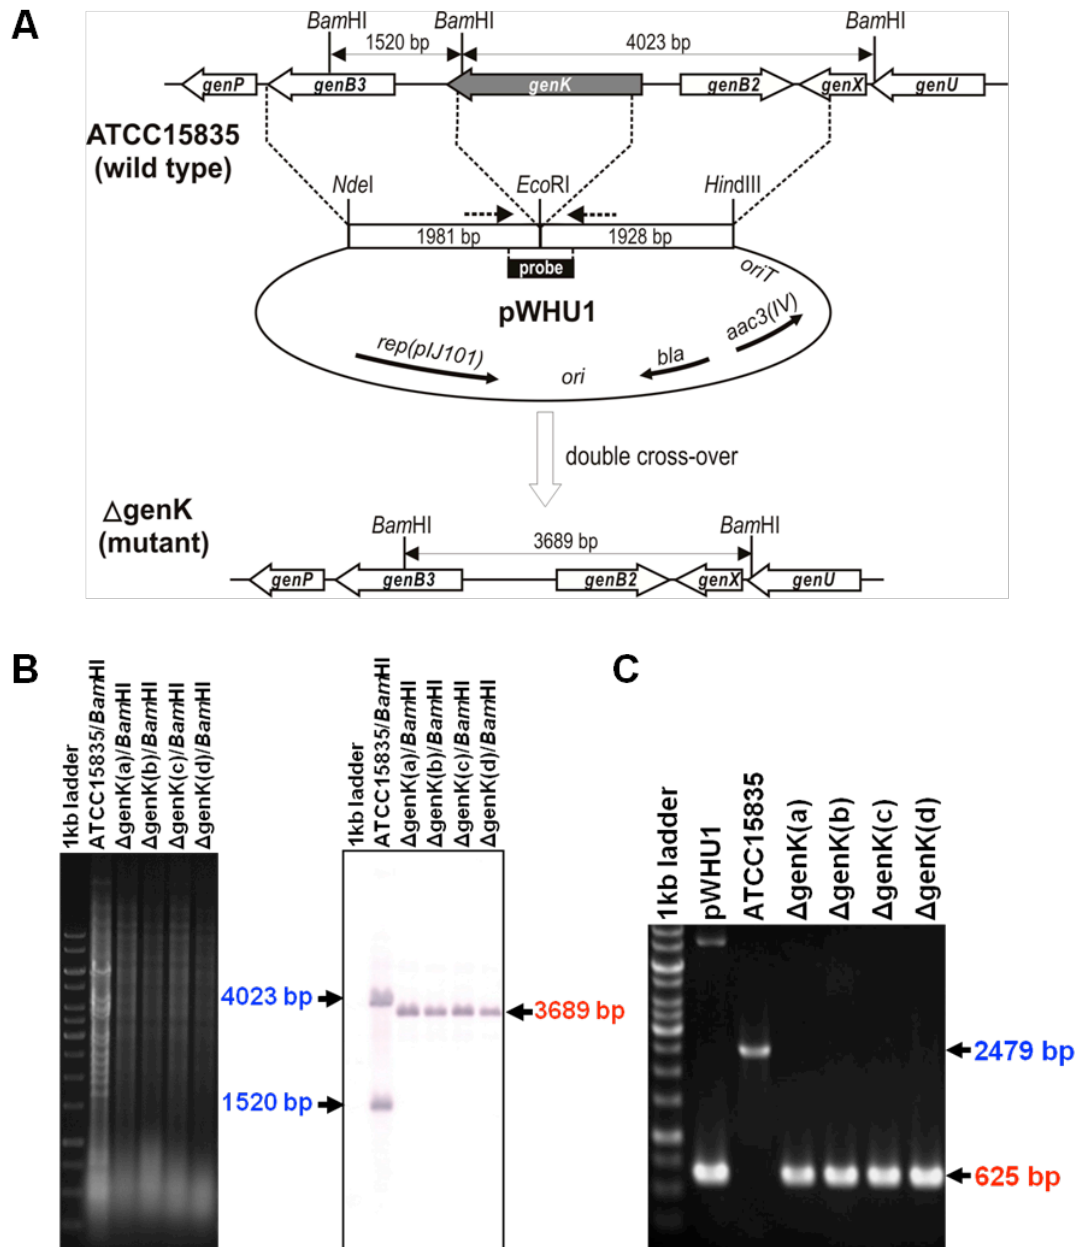

## (2) $\Delta$ genQ

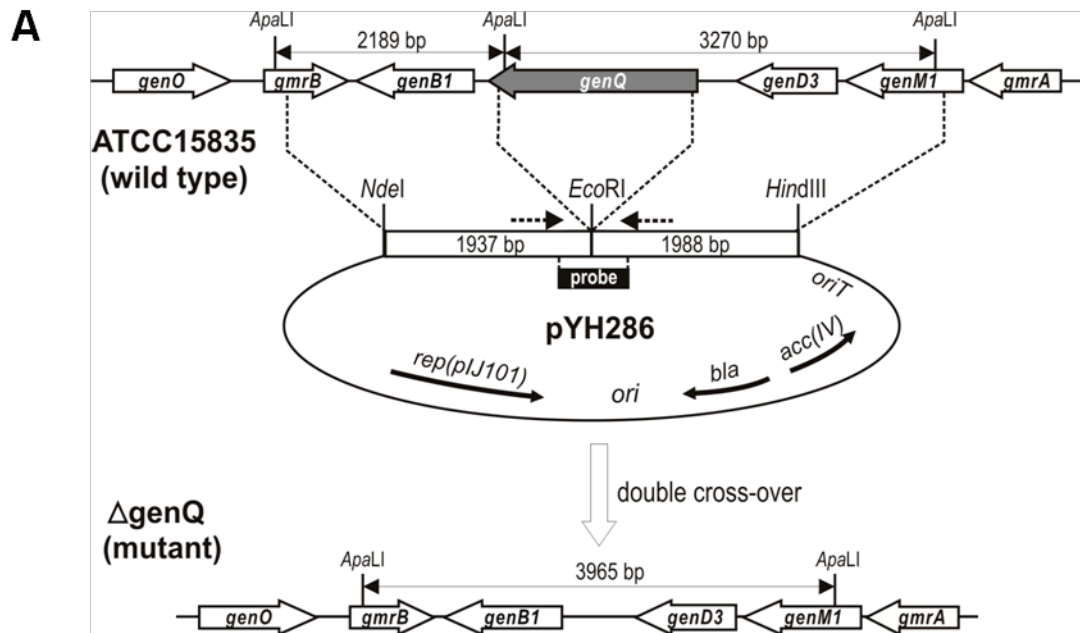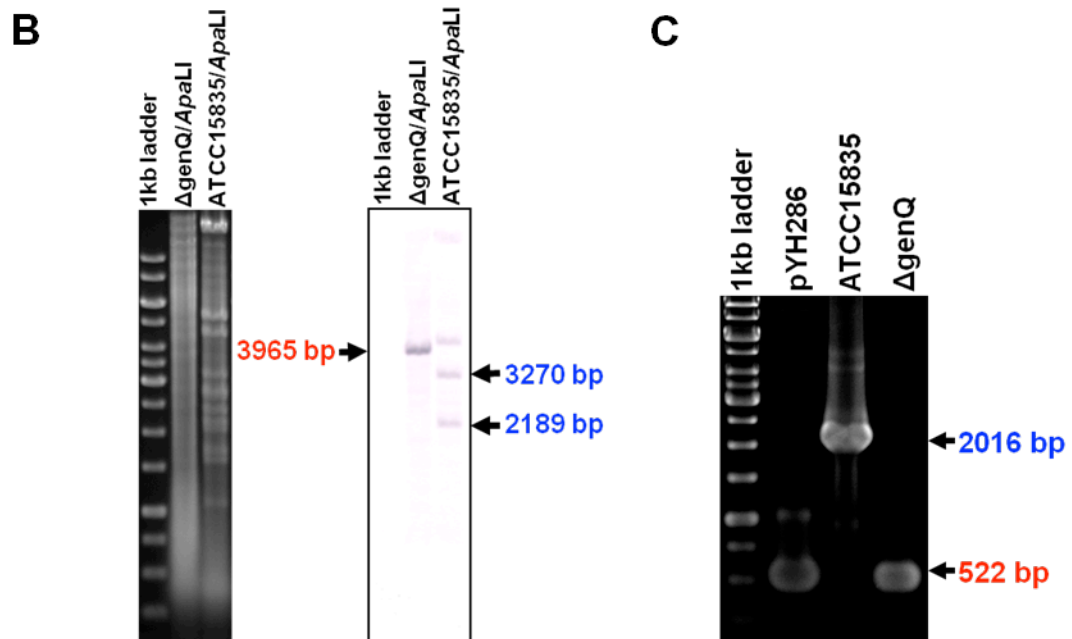

### (3) $\Delta$ genQ $\Delta$ genK

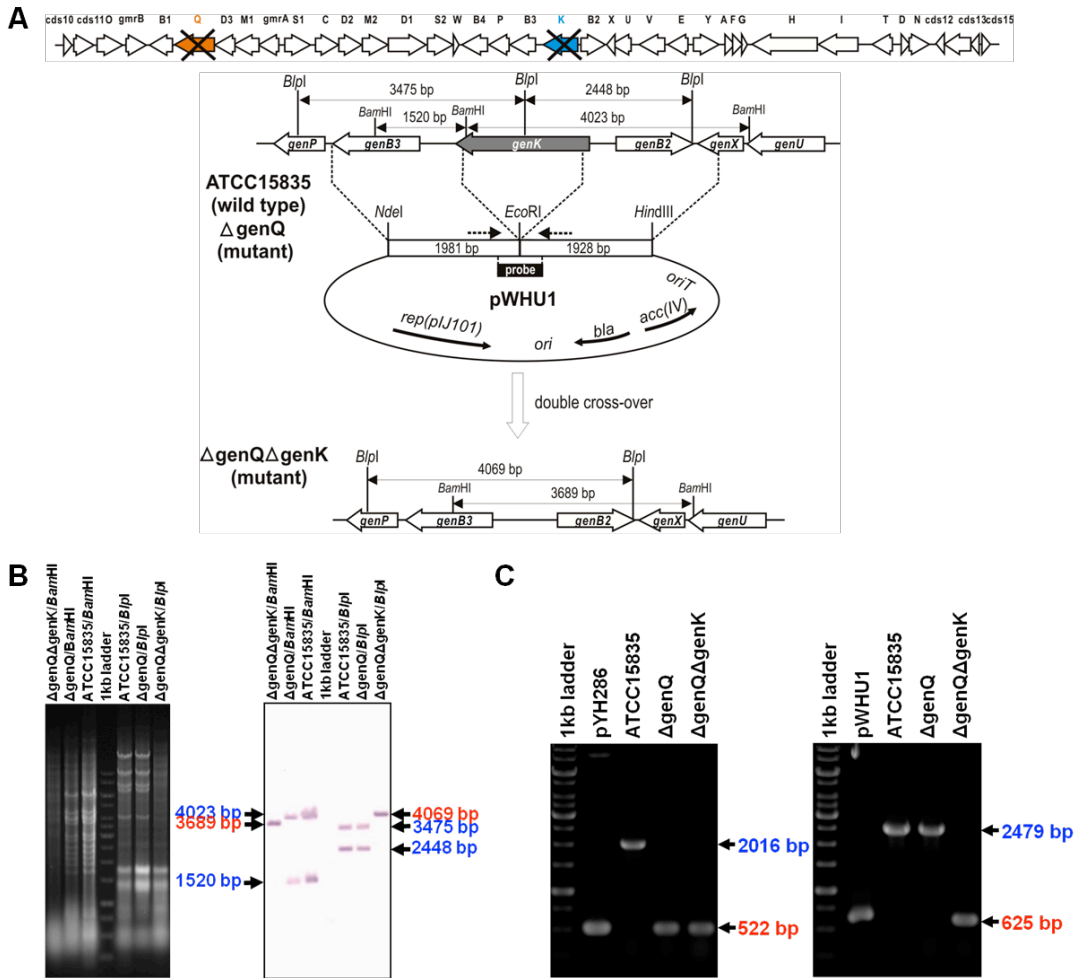

### (4) Complementation of $\Delta$ genK and $\Delta$ genQ

Confirmation of complementation strains (A)  $\Delta$ genK::*genK*, (B)  $\Delta$ genQ::*genQ* and (C)  $\Delta$ genQ::*neo11* by PCR. The arrows indicate the expected size of the PCR fragments in the wild type and mutants. (D) Map of genetic complementation vector. The dash arrows indicate the location of PCR primers for check complementation strains.

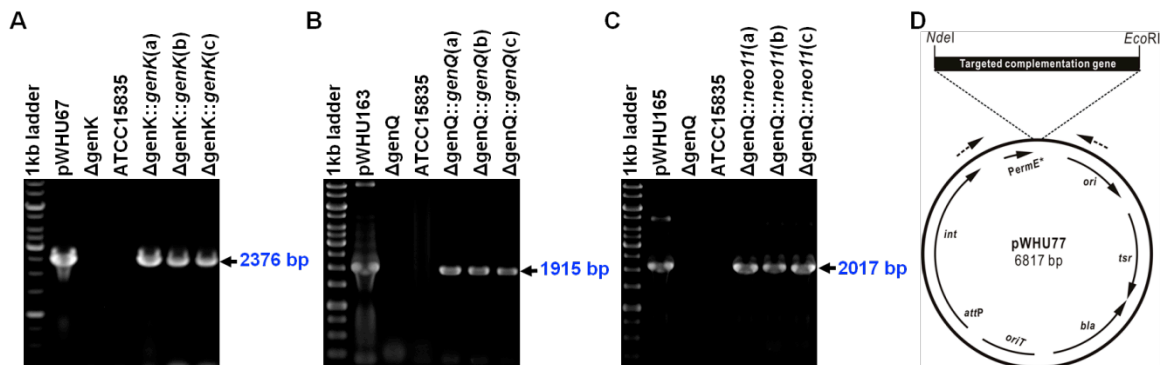

**Figure S3, related to Figure 2. LC-HRMS analysis of production of gentamicin C complex and intermediates by the wild type,  $\Delta$ genK,  $\Delta$ genQ, and  $\Delta$ genQ $\Delta$ genK mutants of *M. echinospora* ATCC15835**

(A) Schematic representation of the in-frame deletion of *genQ* and *genK*. Deleted genes are shown in dotted arrows. (B) Production of gentamicin C complex and intermediates analyzed by LC-ESI-HRMS and bioassay using *Bacillus pumilus* as indicator strain. -: no production, +: production, ++: increased by about 10-fold compared with wild type, +++: increased by about 100-fold compared with wild type.

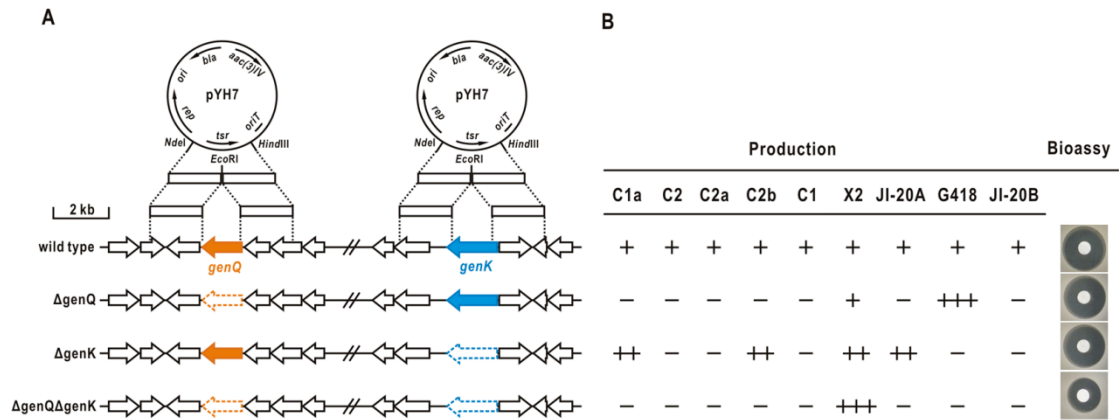



**Figure S4, related to Figure 3.** (A) Sequence alignment of GenB1, GenB2, GenB3 and GenB4 with their homolog Neo18 from the neomycin biosynthetic pathway. The red box in (A) indicates the putative catalytic lysine; (B) Schematic representation and confirmation by Southern blot of in-frame deletion of *genB1*, *genB2*, *genB3* and *genB4*. (1) ~ (4): Single mutants; (5) ~ (10): Double mutants; (11) ~ (14): Triple mutants; (15): Quadruple mutant.

**A**

|       |                                                                       |     |
|-------|-----------------------------------------------------------------------|-----|
| Neo18 | -----MTKNS---SLLAEF                                                   | 11  |
| GenB1 | -----MTIDIGAGKLLAQE                                                   | 14  |
| GenB2 | -----MIIANA                                                           | 6   |
| GenB3 | MAVADHRSSSEPSWRAGRTRARRRSRWHSWARVKSAREGSGQDMSANLTNRGLVERARRVTA        | 60  |
| GenB4 | -----MNYRELIERARRTTA                                                  | 15  |
|       |                                                                       |     |
| Neo18 | PTCFRDEKDRPRVFTAASGAWLTDESDFRWDIFDNARGSILLGHGDPVVAEAVARAAAT--         | 69  |
| GenB1 | PTCFRDADGRPRVFVEGSGAYLTDPDFGRRWIDFNDARGSVVLGHGDEEVAEAIARAA--          | 72  |
| GenB2 | DGCTPEYVARGVTIVRGEAYVYDAEGRGLIDLNSFGSVMLGHQDPVVTEAVLKTVR--            | 64  |
| GenB3 | AENYDIGTRFSAMIQSGEGAWLTDEVEGNYVDLTAASGTTILGHRNQAVTEAITRQIRDF          | 120 |
| GenB4 | AEEYDISGRYPSVIAHAEGAWMTDLSGNRYVDLTGADAVALGKYPVAVNEAITRQIRDY           | 75  |
|       | : . . ** : * . * : * : : . : : ** : . * * * : :                       |     |
|       |                                                                       |     |
| Neo18 | GADGTATGWSRRVDAVLERLHALCGGEVVGFLRSGTAAVRAAVLAVREATGRPLLLSAGY          | 129 |
| GenB1 | GRSGVGTAWSPVLDSLGLQEQVCGGDVGLYRGTAAALRSVTCVARDARDRSIVLSGYS            | 132 |
| GenB2 | SGVFAAASLDLQNHLEAQIAGDLPDQORVAFFKGTAAATRAAASAAARQVTGKRLIASCGY         | 124 |
| GenB3 | GTAFATLSVPRVELAERLCERYECAEKVVFHKGTSEGTAARLARARTGRELILSCGY             | 180 |
| GenB4 | GTTFATLSVPRVELAERMCCERYECAEKVVFHKGTSEGTAARLARARTGRELILSCGY            | 135 |
|       | . . . . : . . . . : * . : : * : . . . . * . . . : : * . **            |     |
|       |                                                                       |     |
| Neo18 | HGYDPMWYSEAPLEPNADGVDDFFDLGLLRELLRA-PERVAVVSPDHMHLSPGWYR              | 188 |
| GenB1 | HGYDPMWH-CDEPFTPNQHGIVEFLFDLDVLAEWLSR-PEQVAVVSPDHMHLSGERWYT           | 190 |
| GenB2 | HGYDLMWE-FTPPGQPNSEDLVLCYHLP ELIDQVLDKHAHELAAVIIAPDYIHVSP EYIA        | 183 |
| GenB3 | HGWHEWQLAGETFGYQQTGTVVGGYNEKALAKMLEAFGNVAVGLISPELLYDFVDFYQ            | 240 |
| GenB4 | HGWHEWQMGAEFFGYQQTGTVVGGYNEKALAKMLEAFGEQVAGVIVSPEVLVDFLDHYR           | 195 |
|       | ** . . . : . . . : . . . : * : : * . . . * . : : * : . . .            |     |
|       |                                                                       |     |
| Neo18 | ELRRLCSAAGVVLVADEVKVGLRYAPGLSTAE-LLAPDVVVAKEMANGHAVSAVGGSR            | 247 |
| GenB1 | ETRLTKEADVPVIADEVKVGLRYRAGLSTP--LLDPAVWVYAKLANGSPVAAVGGDAH            | 248 |
| GenB2 | DLFERCERVGVTIADEVKHGYYLRQGA SVTEASVADMVYAKGISNGWPLSCVAGDER            | 243 |
| GenB3 | RMVALCAR YDVPFMMDEVYTGFRAGP-KGVHGLGVPADVVVSKGLANGHSLAAMVGRD           | 299 |
| GenB4 | RMSALCAR YDVPFMDDEVYTGFRAGP-KGVHGLGVPADVVVLGKGLANGHSLAAMVGRD          | 254 |
|       | : . . . * : * * * * * . . . : . . : * . : * * . . . * *               |     |
|       |                                                                       |     |
| Neo18 | LLKP--LKEVSFTSFFEP TILAAADAALARVATGEPQRAVREAGDRFLRHARKALDDASL         | 305 |
| GenB1 | LLAA--LEDVSFTSYFEP TAMAATTTLRMATGEPQQAIRAAGDRFIAHTRAAFANAGV           | 306 |
| GenB2 | FLKP--LAEFVSTLTFEAP SFAAASATLDRLAELDVAQLAIDGARFVSEAAKMI STRDL         | 301 |
| GenB3 | IIDAYDVS GIQGT YTREVP PMAAAMAVLDVLDTPGVYEHAEAMGRRLADGMREILLTGEI       | 359 |
| GenB4 | IIDAYDVS GIQGT YTREVP PMAAALAVFEVLDTPGVYEHAEAMGRRLADGMREILLTGEI       | 314 |
|       | : . . : . . * . * . : * * * : . . : : . . . * * : : . . :             |     |
|       |                                                                       |     |
| Neo18 | PVEIAGDGTTFQFVPATEELEEAALYGAANAEGLLFYAGDNQGVSAAFDEAVLGEAERRFA         | 365 |
| GenB1 | PIDLAGNGLFQFVCADDEVADAFHAAA AEGLLFEGDNQTPSAAFTDEVVEDACGRID            | 366 |
| GenB2 | PIEMAGTGAFFQFVCA-EVEVEVLLPHALAEGLILEPSDQQYP SACFRGEVVDALERLD          | 360 |
| GenB3 | PNWVGGPALMFDTVLPND DLGWEIYKTAHDFGVYFEDSGTQLVTAFADEAAVDHALTAFR         | 419 |
| GenB4 | PNWVGGPALMFDVLPND DLGWEIYKTAHDFGVYFEDSGTQLVTAFADEAAVDHALTAFR          | 374 |
|       | * . : * . * : * . : : : . . . * . * : : . . * . : * . : * . : .       |     |
|       |                                                                       |     |
| Neo18 | RVCERLAPY--AGGEPVGDAAARYVAWNVMDGLRQAPRDRETTGLLARLLDD-----             | 416 |
| GenB1 | RVSAAITGR---FTDRELTEESWYASAWGAMDGLADRPRTRETTAIVERLWED-----            | 417 |
| GenB2 | RALTTMAAARPDVGREVTQLDRVNAAFQMDGLPGRPDGWSLDQCV EYVTAQL-----            | 414 |
| GenB3 | KATRQVIADRPDIAPTSGGELTEERKLDFAEEAFGLLRDDEIN ALIDETIEKV VNRDR          | 479 |
| GenB4 | KATRQVADRPDIAPTSGGELTEERKLDFAEEAFGLLRDDEIN ALIDETIEKV VNRDR           | 434 |
|       | : . : : : : : : : : : : : : : : : : : : : : : : : : : : : : : : : : : |     |
|       |                                                                       |     |
| Neo18 | -----                                                                 |     |
| GenB1 | -----                                                                 |     |
| GenB2 | -----                                                                 |     |
| GenB3 | SIKPVLP AQN 490                                                       |     |
| GenB4 | SIKPVLP AQN 445                                                       |     |

## B

### (1) $\Delta$ genB1

The arrows indicate the expected size of the fragments from the wild type and mutant chromosomal DNA, respectively, hybridized after digestion with *AgeI* with a 581 bp probe (PCR-amplified from pWHU4 using oligonucleotide primers genB1-CK1 and CK2).

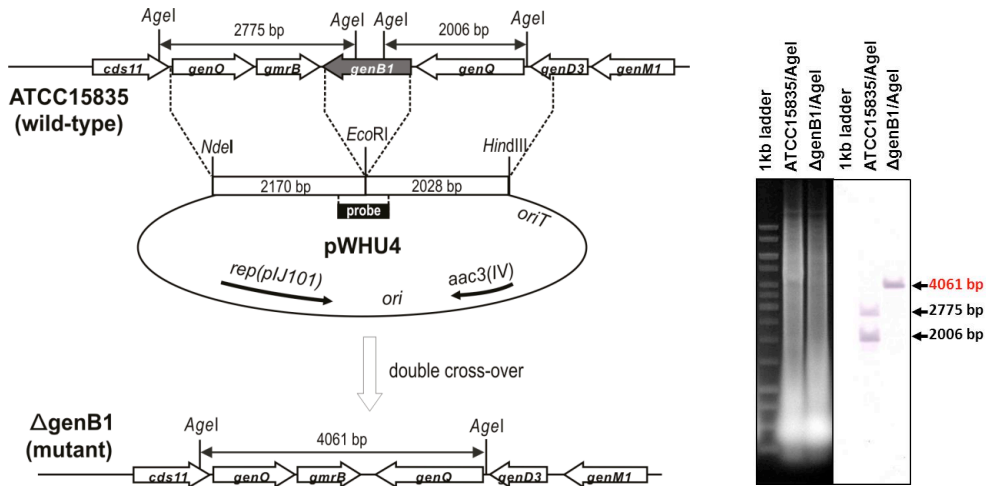

### (2) $\Delta$ genB2

The arrows indicate the expected size of the fragments from the wild type and mutant chromosomal DNA, respectively, hybridized after digestion with *NspI* with a 587 bp probe (PCR-amplified from pWHU2 using oligonucleotide primers genB2-CK1 and CK2).

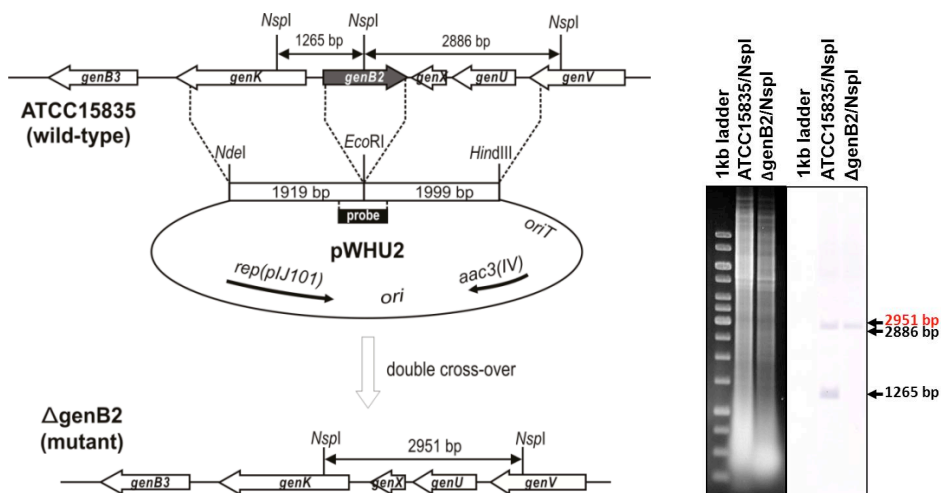

### (3) $\Delta$ genB3

The arrows indicate the expected size of the fragments from the wild type and mutant chromosomal DNA, respectively, hybridized after digestion with *NspI* with a 658 bp probe (PCR-amplified from pWHU5 using oligonucleotide primers genB3-CK1 and CK2).

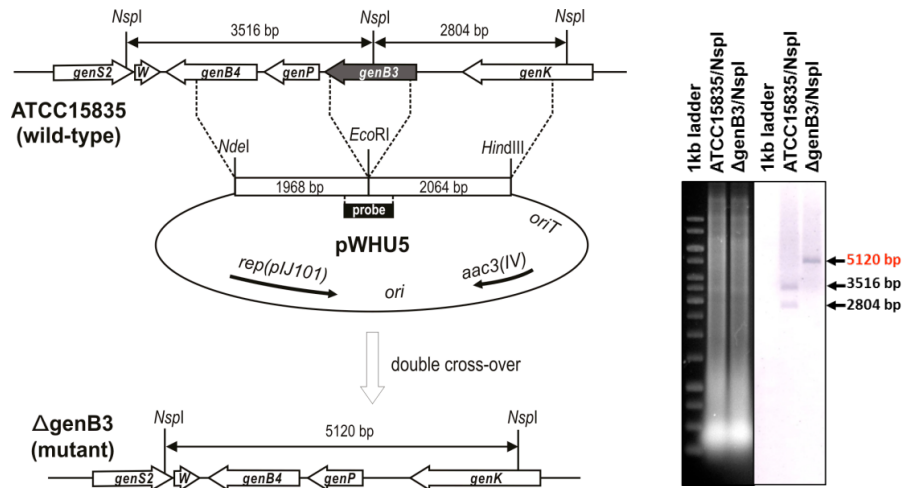

### (4) $\Delta$ genB4

The arrows indicate the expected size of the fragments from the wild type and mutant chromosomal DNA, respectively, hybridized after digestion with *SacI* with a 595 bp probe (PCR-amplified from pWHU3 using oligonucleotide primers genB4-CK1 and CK2).

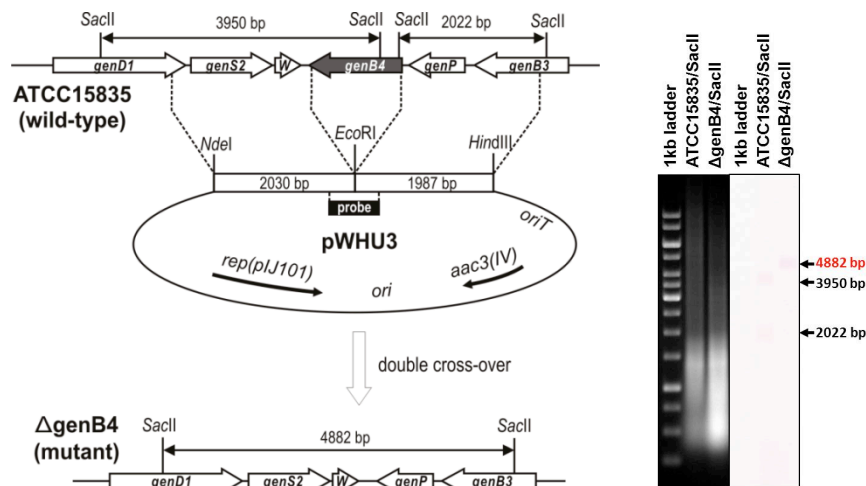

### (5) $\Delta$ genB2 $\Delta$ genB1

The arrows indicate the expected size of the fragments from the wild type and mutants chromosomal DNA, respectively, hybridized after digestion with *AgeI* with a 581 bp probe (PCR-amplified from pWHU4 using oligonucleotide primers genB1-CK1 and CK2).

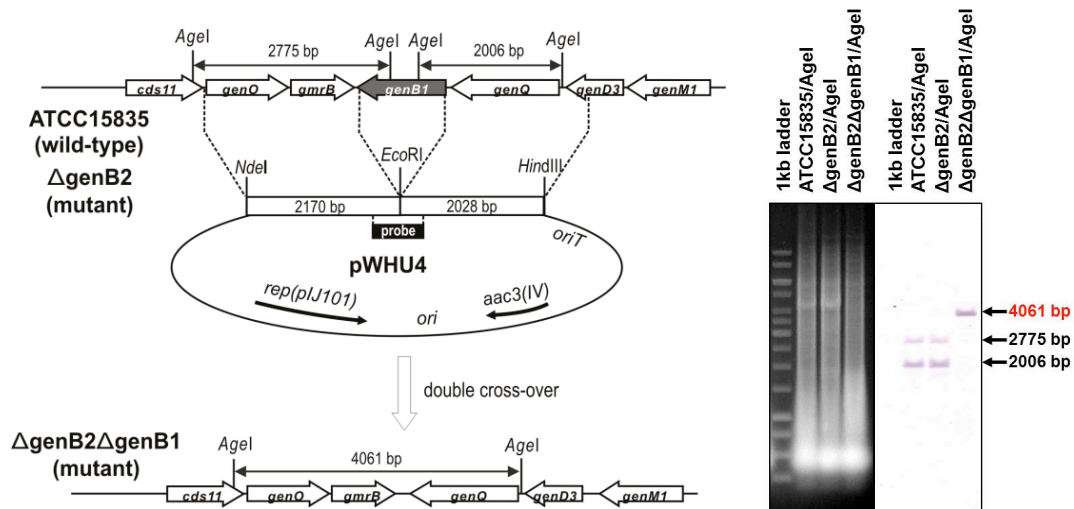

### (6) $\Delta$ genB1 $\Delta$ genB3

The arrows indicate the expected size of the fragments from the wild type and mutants chromosomal DNA, respectively, hybridized after digestion with *PshAI* to a 658 bp probe (PCR-amplified from pWHU5 using oligonucleotide primers genB3-CK1 and CK2).

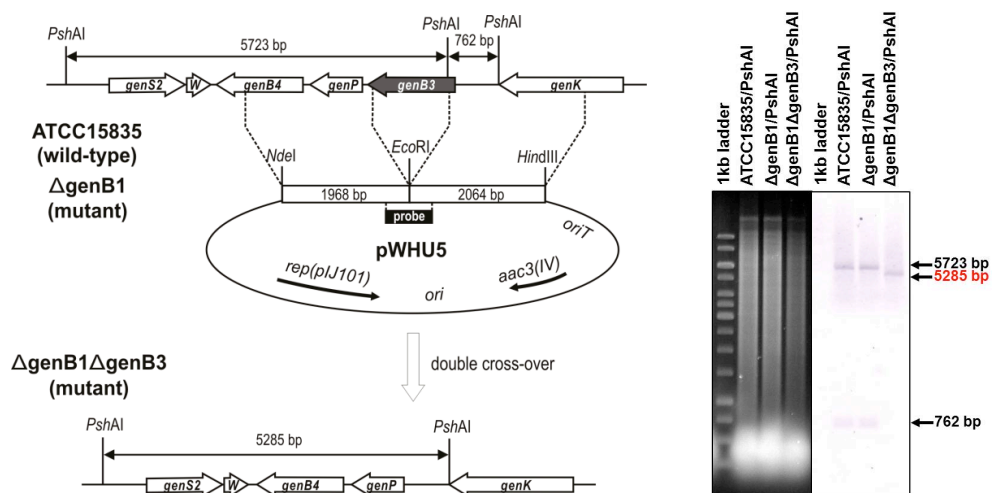

### (7) $\Delta$ genB4 $\Delta$ genB3

The arrows indicate the expected size of the fragments from the wild type and mutants chromosomal DNA, respectively, hybridized after digestion with *Sac*II with a 741 bp probe (PCR-amplified from pWHU43 using oligonucleotide primers genB4-genB3-CK1 and CK2).

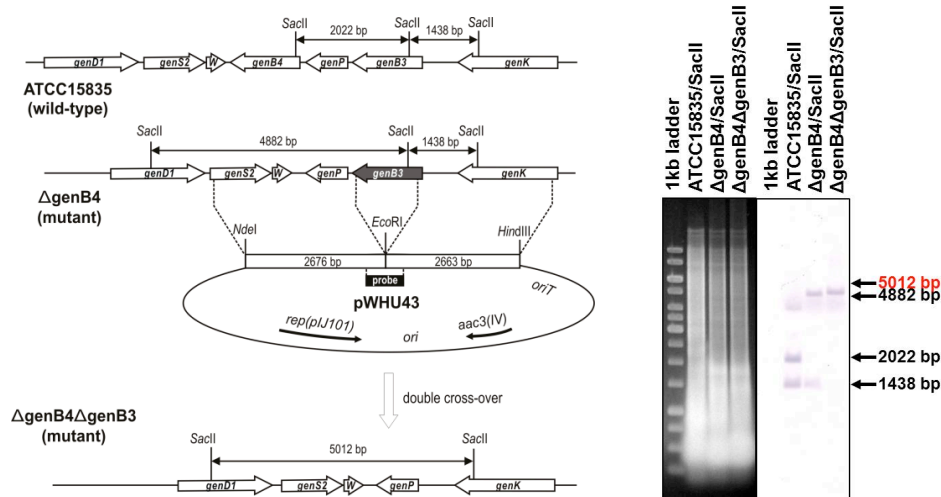

### (8) $\Delta$ genB2 $\Delta$ genB3

The arrows indicate the expected size of the fragments from the wild type and mutants chromosomal DNA, respectively, hybridized after digestion with *Psh*AI with a 658 bp probe (PCR-amplified from pWHU5 using oligonucleotide primers genB3-CK1 and CK2).

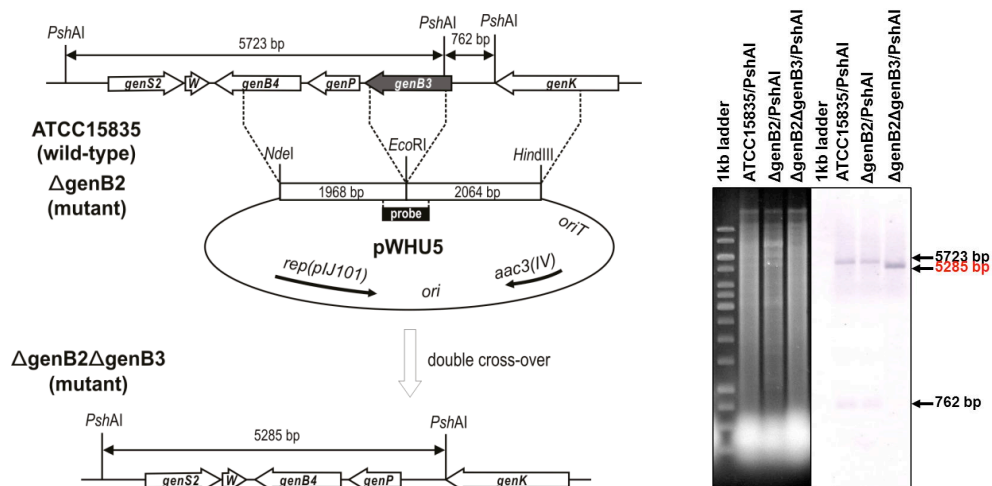

### (9) $\Delta$ genB2 $\Delta$ genB4

The arrows indicate the expected size of the fragments from the wild type and mutants chromosomal DNA, respectively, hybridized after digestion with *Sac*II with a 595 bp probe (PCR-amplified from pWHU3 using oligonucleotide primers genB4-CK1 and CK2).

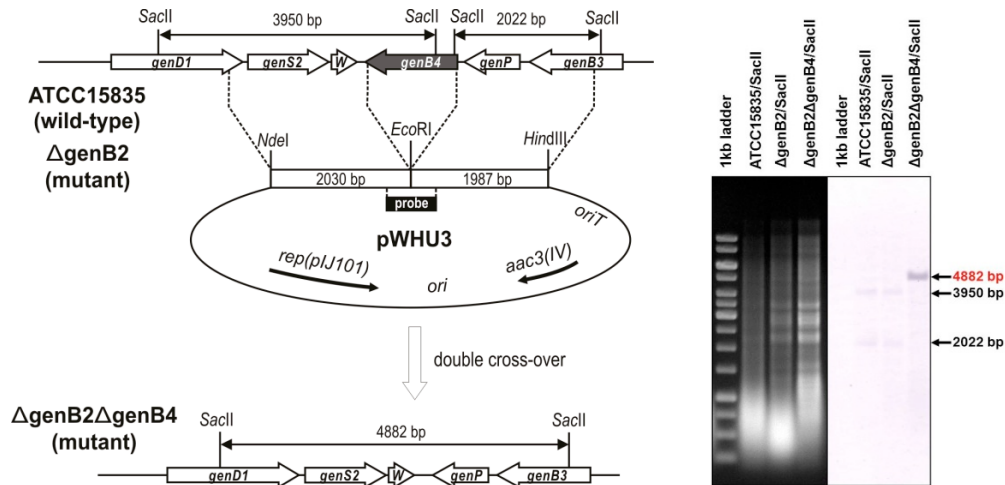

### (10) $\Delta$ genB4 $\Delta$ genB1

The arrows indicate the expected size of the fragments from the wild type and mutants chromosomal DNA, respectively, hybridized after digestion with *Age*I with a 581 bp probe (PCR-amplified from pWHU4 using oligonucleotide primers genB1-CK1 and CK2) respectively,.

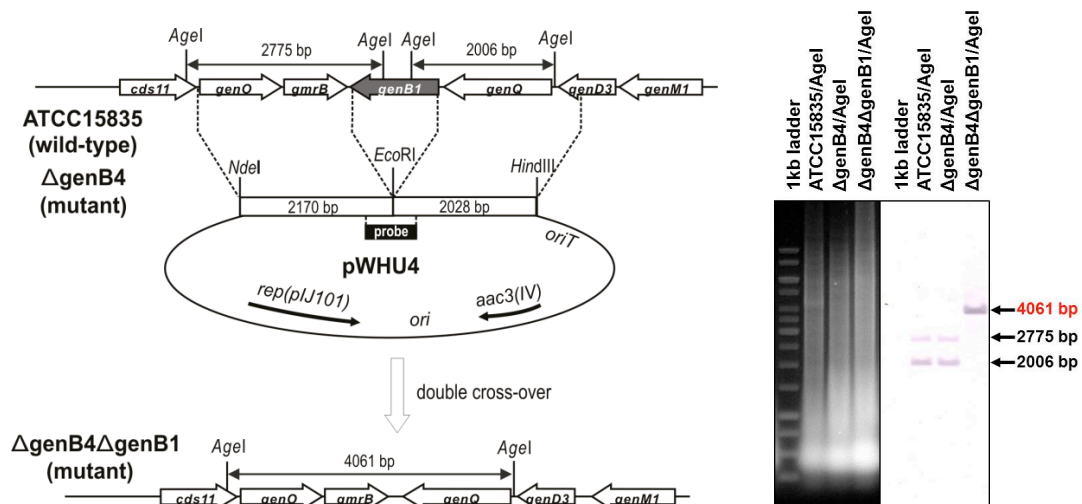

### (11) $\Delta$ genB4 $\Delta$ genB1 $\Delta$ genB2

The arrows indicate the expected size of the fragments from the wild type and mutant chromosomal DNA, respectively, hybridized after digestion with *Pvu*I with a 587 bp probe (PCR-amplified from pWHU2 using oligonucleotide primers genB2-CK1 and CK2).

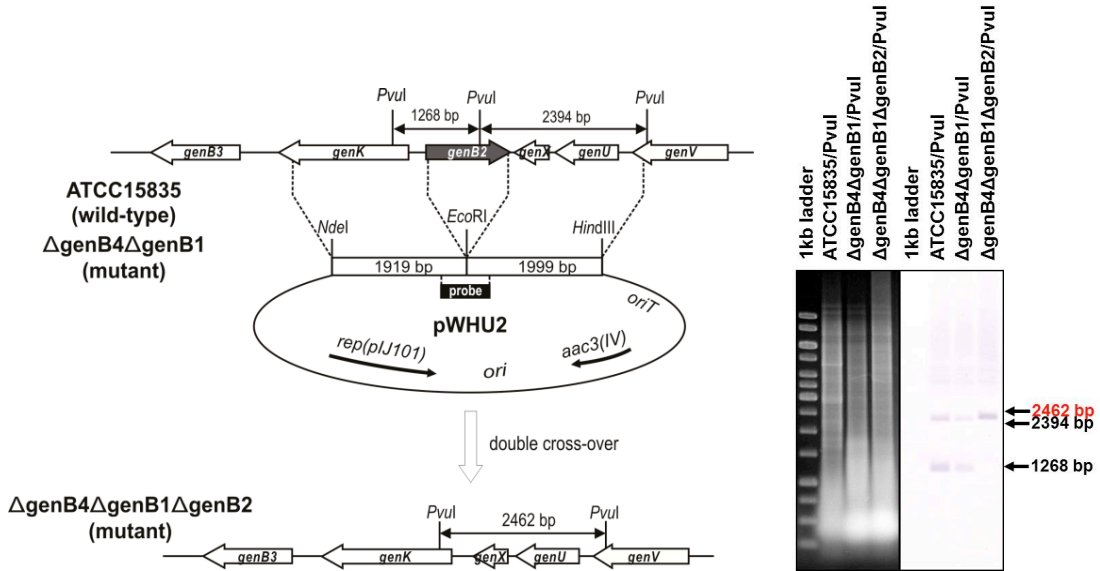

### (12) $\Delta$ genB4 $\Delta$ genB1 $\Delta$ genB3

The arrows indicate the expected size of the fragments from the wild type and mutants chromosomal DNA, respectively, hybridized after digestion with *Sac*II with a 741 bp probe (PCR-amplified from pWHU43 using oligonucleotide primers genB4-genB3-CK1 and CK2).

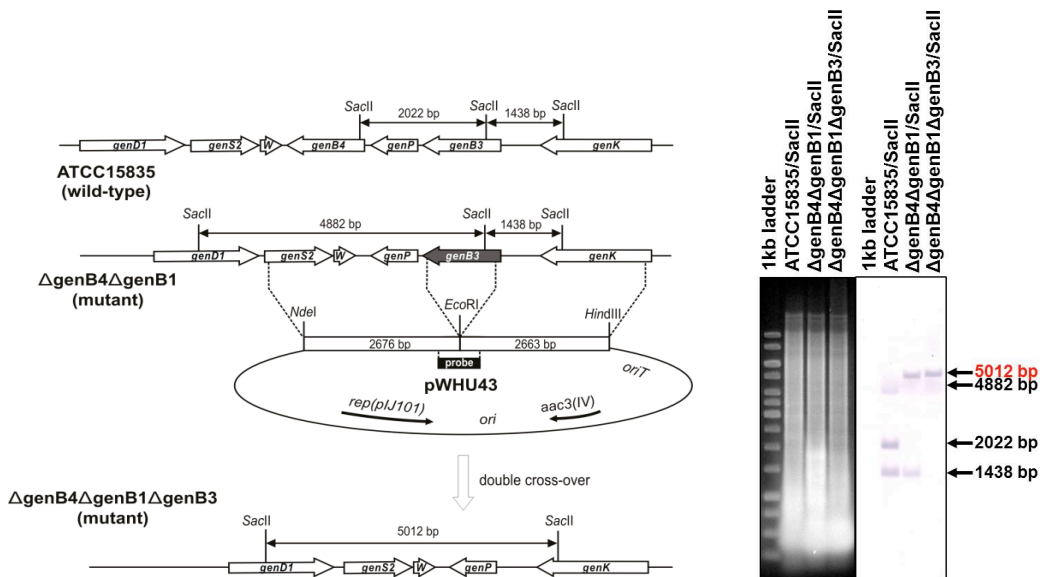

### (13) $\Delta$ genB2 $\Delta$ genB3 $\Delta$ genB1

The arrows indicate the expected size of the fragments from the wild type and mutants chromosomal DNA, respectively, hybridized after digestion with *AgeI* with a 581 bp probe (PCR-amplified from pWHU4 using oligonucleotide primers genB1-CK1 and CK2).

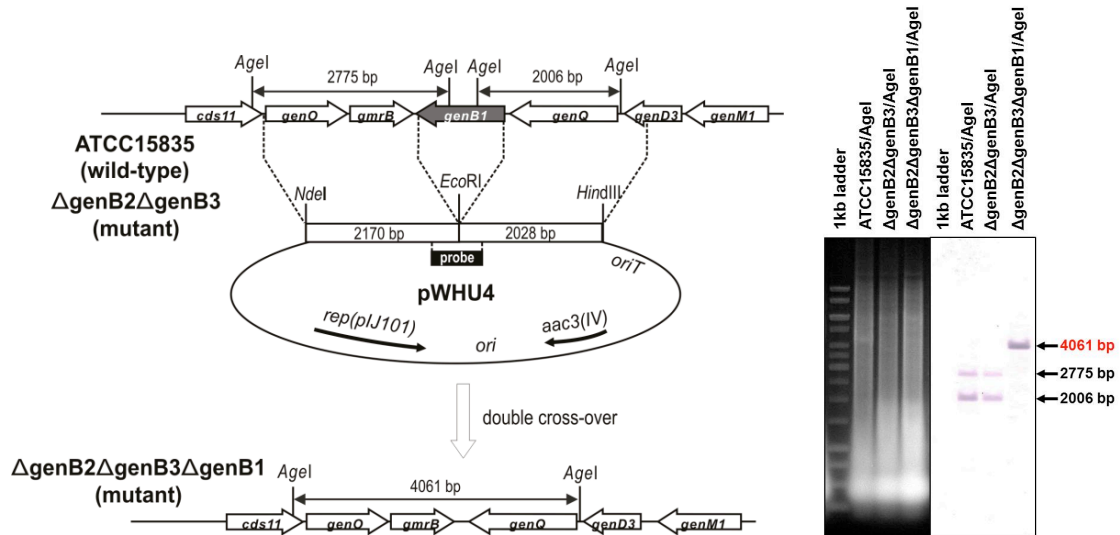

### (14) $\Delta$ genB2 $\Delta$ genB4 $\Delta$ genB3

The arrows indicate the expected size of the fragments from the wild type and mutants chromosomal DNA, respectively, hybridized after digestion with *SacI* with a 741 bp probe (PCR-amplified from pWHU43 using oligonucleotide primers genB4-genB3-CK1 and CK2).

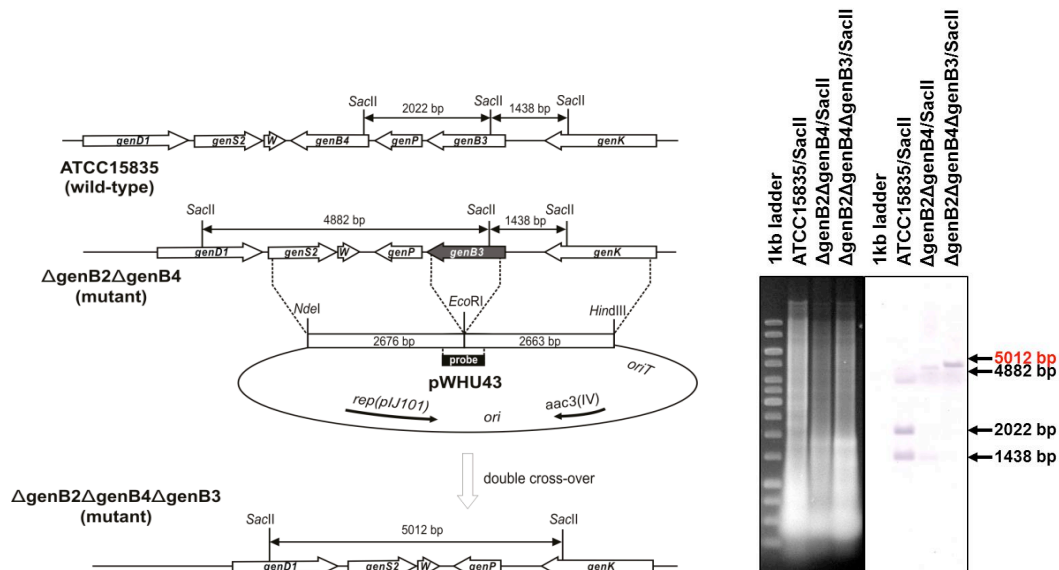



### (15) $\Delta$ genB4 $\Delta$ genB1 $\Delta$ genB3 $\Delta$ genB2

The arrows indicate the expected size of the fragments from the wild type and mutants chromosomal DNA, respectively, hybridized after digestion with *Pvu*I with a 587 bp probe (PCR-amplified from pWHU2 using oligonucleotide primers genB2-CK1 and CK2).

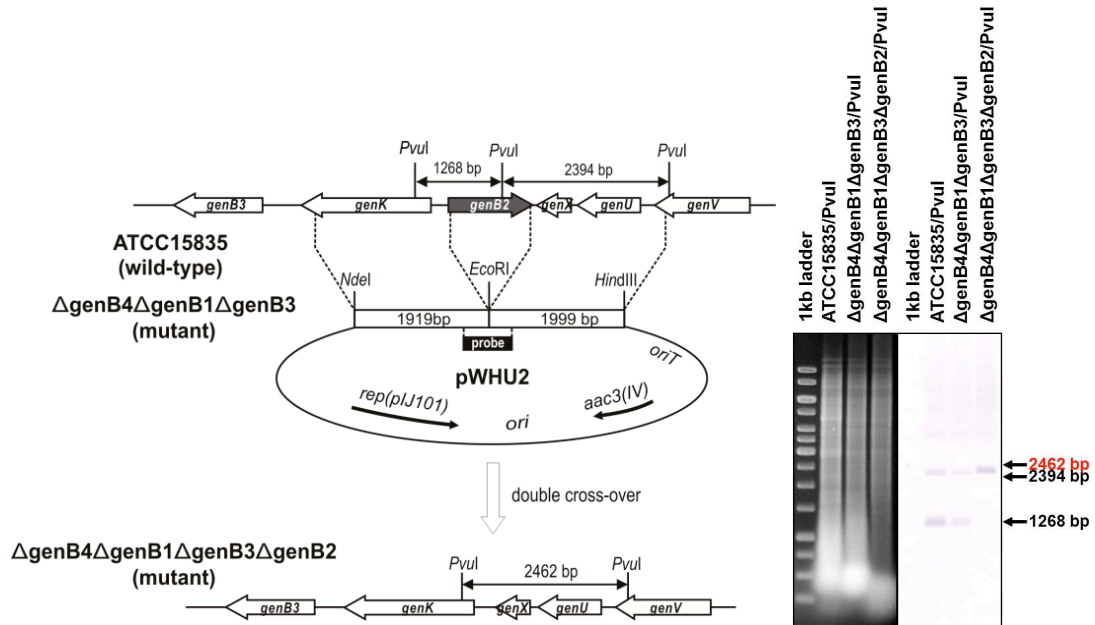

**Figure S5, related to Figure 3. Confirmation of C2a production in  $\Delta$ genB2 and  $\Delta$ genB2 $\Delta$ genB1 mutants**

(A) Comparison of product mixture from strain  $\Delta$ genB2 with gentamicin C2 standard; (B) Comparison of product mixture from strain  $\Delta$ genB2 $\Delta$ genB1 with gentamicin C2 standard; (C) Comparison of product mixture from strain  $\Delta$ genB2 with gentamicin C2a standard; (B) Comparison of product mixture from strain  $\Delta$ genB2 $\Delta$ genB1 with gentamicin C2a standard; (E) Comparison of product mixture from strain  $\Delta$ genB2 with gentamicin C1 standard; (F) Comparison of product mixture from strain  $\Delta$ genB2 $\Delta$ genB1 with gentamicin C1 standard.

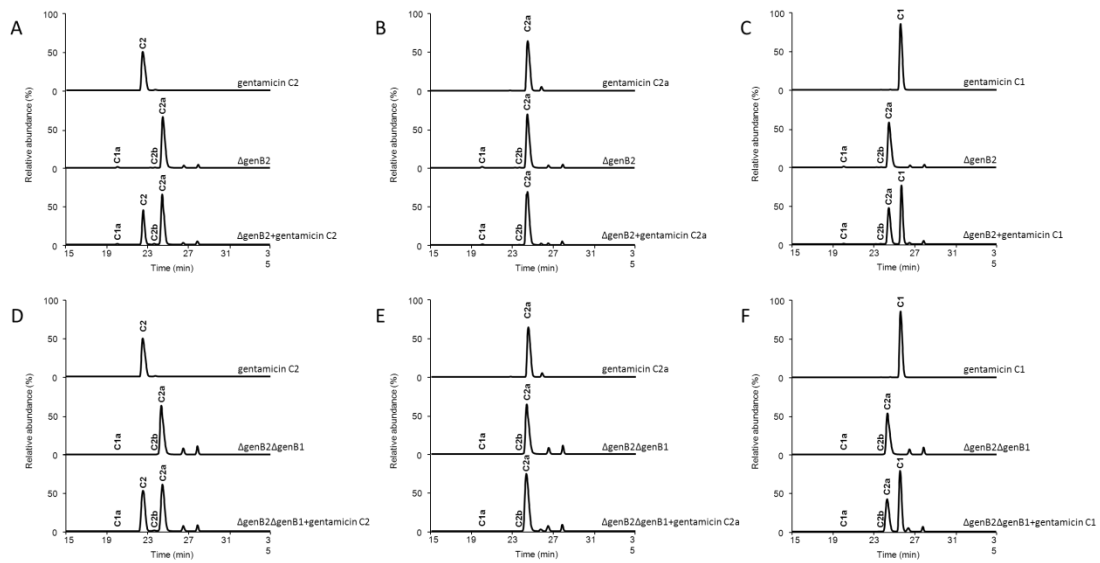

**Figure S6, related to Figures 4, 5 and 6. Cloning and characterization of GenQ, GenB1, GenB2, GenB3 and GenB4**

(A) Cloning *genQ* with alternative start codons. Positions of the original start codon of *genQ* and the new start codons in LM\_ *genQ* and VM\_ *genQ* are indicated in red boxes; (B) SDS-PAGE gel of VM\_ GenQ, GenB1, GenB2, GenB3 and GenB4; (C) UV-Vis spectra of VM\_ GenQ and FAD standard; (D) UV-Vis spectra of GenB proteins.

**A**

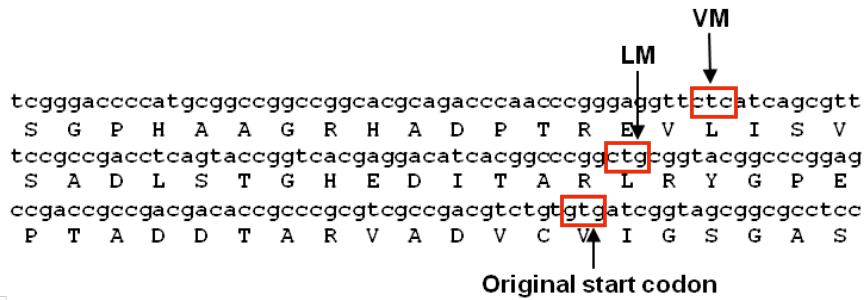

**B**

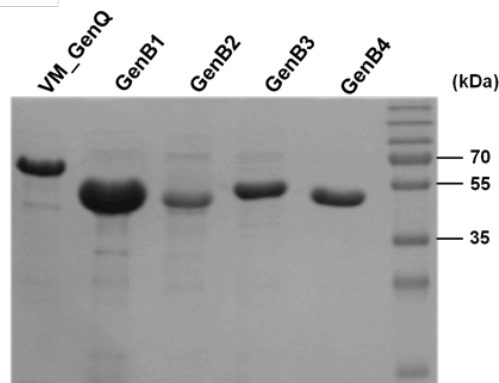

**C**

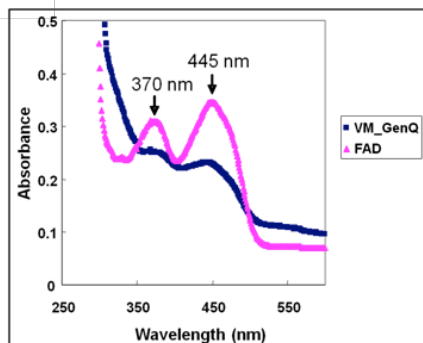

**D**

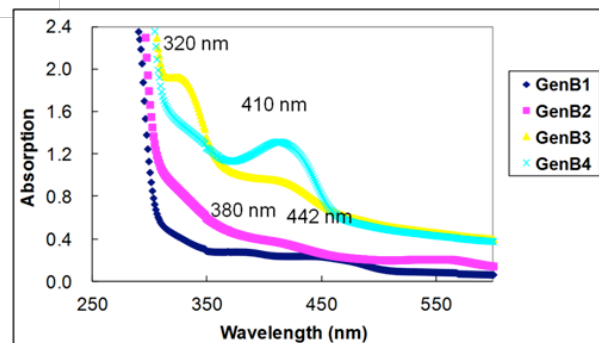

**Figure S7, related to Figures 4 and 5. LC-MS analysis of activity assays of GenB1, GenB2, GenB3 and GenB4 (GenB)**

(A) Test of different amino donors on the conversion of G418 to JI-20B (i - iv) and of gentamicin X2 to JI-20A(v - viii) catalysed by VM\_GenQ coupled with GenB1, GenB2, GenB3, and GenB4 by LC-MS analysis. The percentages of G418, gentamicin X2, 6'-DOG, 6'-DOX, JI-20B and JI-20A present after 16 h of incubation, based on the abundance of corresponding ions detected, are shown as stacked plots. (B) LC-MS analysis of isomerase activity of GenB enzymes on gentamicin C2 and C2a. Selective ion monitoring  $[M+H]^+$  ( $m/z$  464) and  $[M+Na]^+$  ( $m/z$  486) ions of C2 and C2a.

**A**

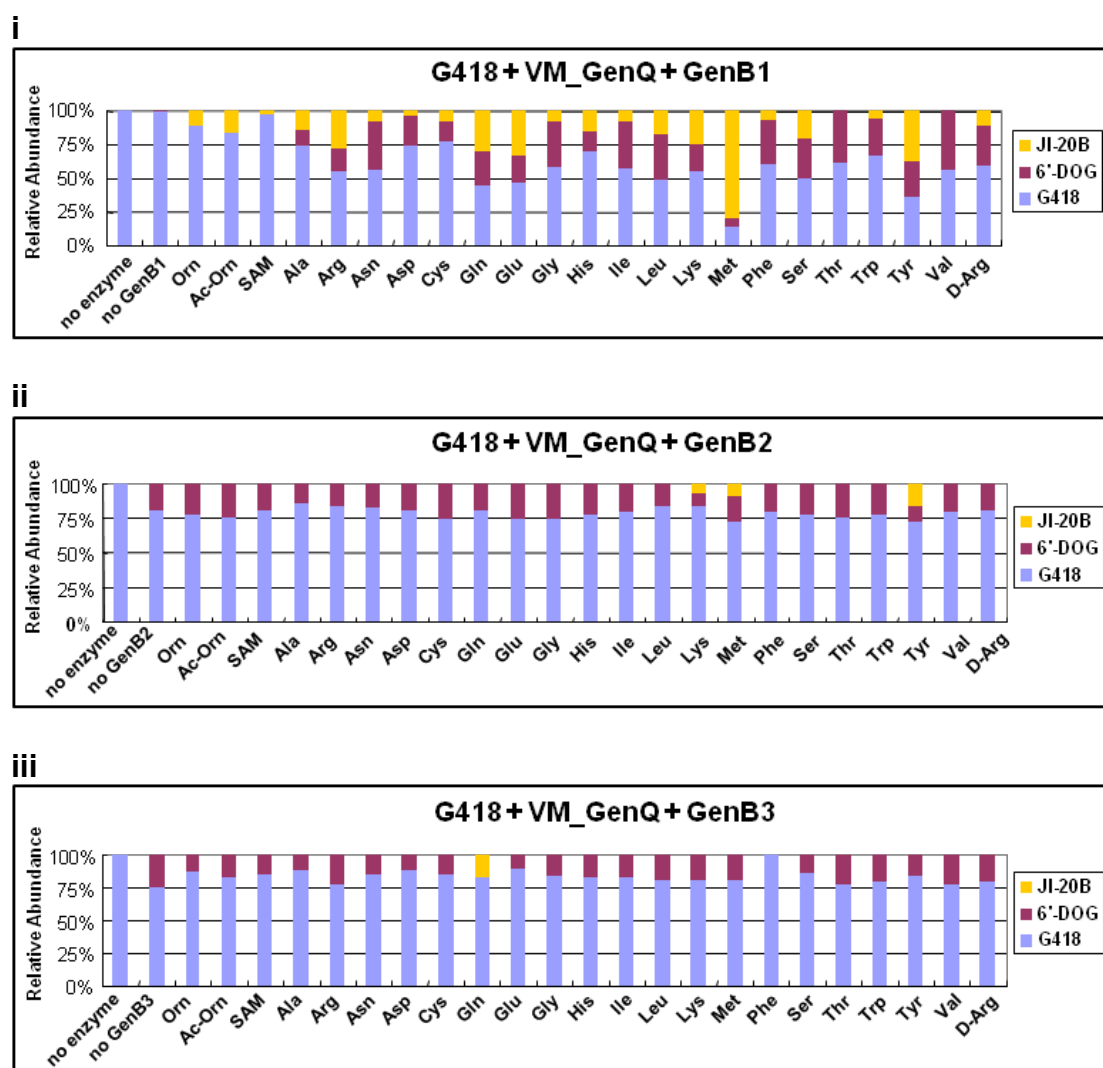

iv

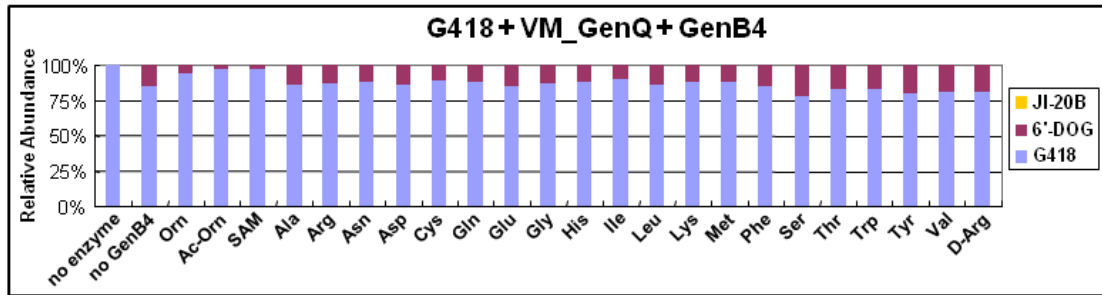

v

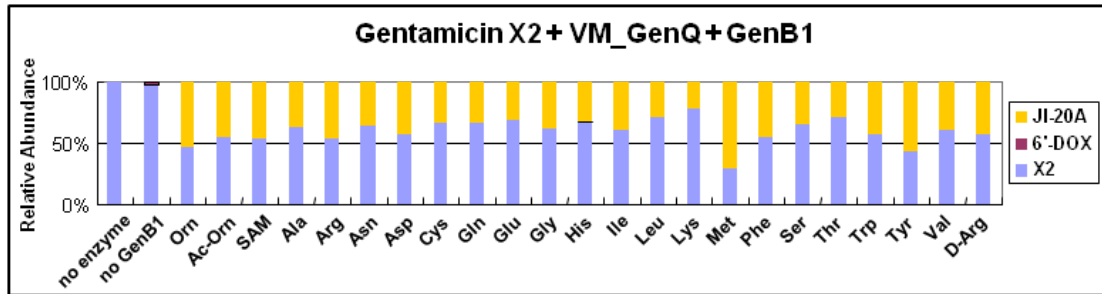

vi

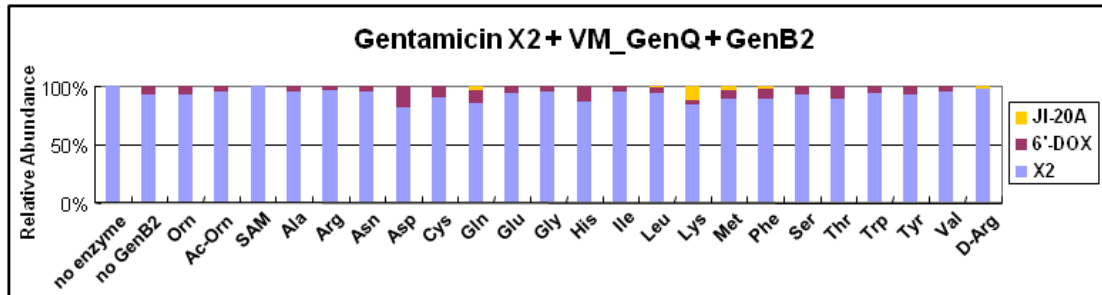

vii

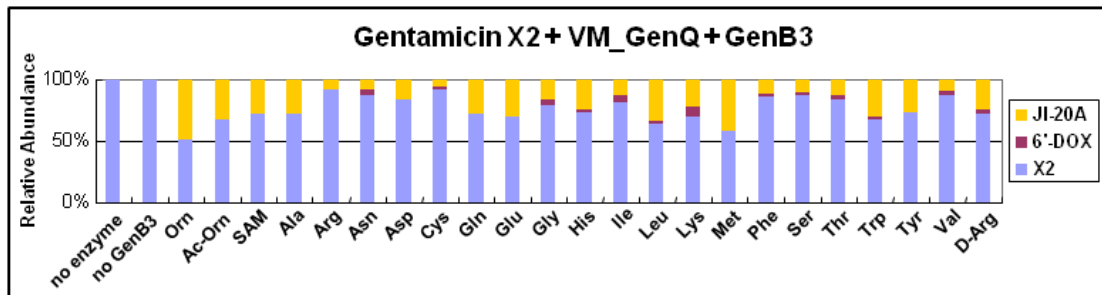

viii

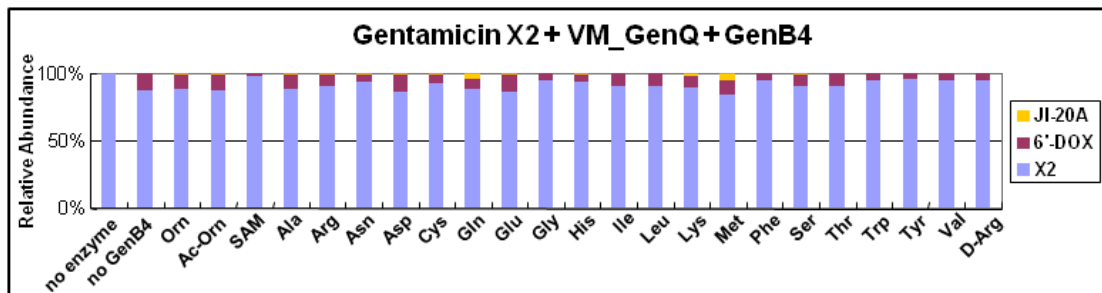

B

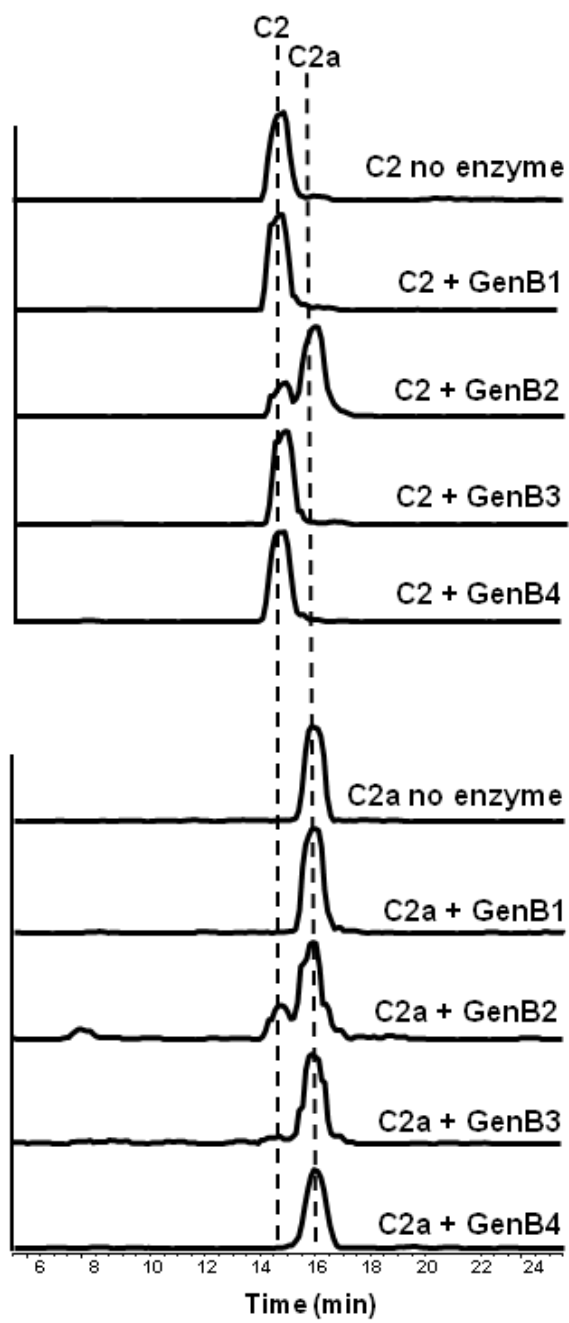

**List of oligonucleotide primers used in this study, related to Experimental Procedures**

| <b>Primer</b> | <b>Oligonucleotide sequences (5' to 3')</b> | <b>Restriction site</b> |
|---------------|---------------------------------------------|-------------------------|
| genQ-L1       | CTG <b>CATATG</b> CTCACCGCCCGGC             | <i>NdeI</i>             |
| genQ-L2       | CCC <b>GAATTC</b> TCCCTGTGACCTGTCTG         | <i>EcoRI</i>            |
| genQ-R1       | ACC <b>GAATTC</b> GCCGCTACCGATCACAC         | <i>EcoRI</i>            |
| genQ-R2       | GGC <b>AAGCTT</b> GATCGGAACCATCCGG          | <i>HindIII</i>          |
| genQ-CP1      | CCTCCTCGTCACCGTGG                           | -                       |
| genQ-CP2      | CAGGTGCTCAGCGTCCG                           | -                       |
| genQ-EP1      | GT <b>CATATG</b> ATCGGTAGCGGCGCC            | <i>NdeI</i>             |
| genQ-EP2      | CG <b>GAATTC</b> ACAGGGAGAAATCGG            | <i>EcoRI</i>            |
| neo11-EP1     | CGC <b>CATATG</b> AAGCGCCTTCGAGGC           | <i>NdeI</i>             |
| neo11-EP2     | CCG <b>GAATTC</b> TCAGACGTGCGCGGTGTG        | <i>EcoRI</i>            |
| genK-L1       | GCG <b>CATATG</b> AGAACCGGCTTGATGC          | <i>NdeI</i>             |
| genK-L2       | GCG <b>GAATTC</b> CACTGACCCTCGTCCC          | <i>EcoRI</i>            |
| genK-R1       | GAG <b>GAATTC</b> CTTCACTTGATTACC           | <i>EcoRI</i>            |
| genK-R2       | CAC <b>AAGCTT</b> CACCGGCGAGACG             | <i>HindIII</i>          |
| genK-CP1      | CGGGCGAACCTTCGGGATA                         | -                       |
| genK-CP2      | CCGTCAGCGTTGGCAATA                          | -                       |
| genK-EP1      | CGC <b>CATATG</b> AACGCGCTGGTGGCA           | <i>NdeI</i>             |
| genK-EP2      | CCG <b>GAATTC</b> TCAGTGGGAAACCGCCTC        | <i>EcoRI</i>            |
| genB1-L1      | GCA <b>CATATG</b> CTGGAGAATCCGTCTG          | <i>NdeI</i>             |
| genB1-L2      | GTC <b>GAATTC</b> CTCTGGGAGGACTGAG          | <i>EcoRI</i>            |
| genB1-R1      | ACC <b>GAATTC</b> GATGGTCATCGTGTCTG         | <i>EcoRI</i>            |
| genB1-R2      | GAA <b>AAGCTT</b> GACCGTCAACCTGGCG          | <i>HindIII</i>          |
| genB1-CK1     | GAGTCGTCGTACTTCTGGATGGG                     | -                       |
| genB1-CK2     | GCTGACCTGGGGTTGCTGC                         | -                       |
| genB2-L1      | GCG <b>CATATG</b> TCACCGGCGAAGCGGC          | <i>NdeI</i>             |
| genB2-L2      | CGT <b>GAATTC</b> GTCAGCGTTGGCAATA          | <i>EcoRI</i>            |
| genB2-R1      | GTG <b>GAATTC</b> GTGACCGCTCAGCTCT          | <i>EcoRI</i>            |
| genB2-R2      | GTC <b>AAGCTT</b> GTTGCAGGCGGTCCAG          | <i>HindIII</i>          |
| genB2-CK1     | GCCGACTTCGACCTCTTCC                         | -                       |
| genB2-CK2     | ATCCGCTGACCCCGTGCC                          | -                       |

|                 |                                          |                |
|-----------------|------------------------------------------|----------------|
| genB3-L1        | CGT <b>CATATG</b> GCAACACCACGTCCG        | <i>NdeI</i>    |
| genB3-L2        | GAC <b>GAATTC</b> ATCGAGAAGGTGGTC        | <i>EcoRI</i>   |
| genB3-R1        | CGA <b>GAATTC</b> GGTCCCGATGTCGTAG       | <i>EcoRI</i>   |
| genB3-R2        | CTT <b>AAGCTT</b> TGGCGAGGGGCTCTGC       | <i>HindIII</i> |
| genB3-CK1       | CGCGTTACGGAAAGTAAAATCAC                  | -              |
| genB3-CK2       | CATCGAGGGCCACCACC                        | -              |
| genB4-L1        | CGC <b>CATATG</b> CAGCGGTTCAAGGGCG       | <i>NdeI</i>    |
| genB4-L2        | GTC <b>GAATTC</b> CCGGCACAGAACTGAC       | <i>EcoRI</i>   |
| genB4-R1        | GAT <b>GAATTC</b> ACGGTAGTTCATGTGC       | <i>EcoRI</i>   |
| genB4-R2        | CGG <b>AAGCTT</b> TGTGTGAGCGGTACGG       | <i>HindIII</i> |
| genB4-CK1       | TGACTTCTGCCTCGACAACG                     | -              |
| genB4-CK2       | AAGCTCTACCTGGAGACCTTCC                   | -              |
| genB4-genB3-L1  | GGC <b>CATATG</b> CGGTGGCGACCC           | <i>NdeI</i>    |
| genB4-genB3-L2  | CGC <b>GGTACC</b> AAGCCGGTTCTCA          | <i>KpnI</i>    |
| genB4-genB3-R1  | CAA <b>GGTACC</b> AGAATCCATGTCC          | <i>KpnI</i>    |
| genB4-genB3-R2  | AAT <b>AAGCTT</b> GGGAATTAGTCCAG         | <i>HindIII</i> |
| genB4-genB3-CK1 | CAGCGTTCCTCCGGTTTC                       | -              |
| genB4-genB3-CK2 | GGTAAGTGATCCGCAGTTGG                     | -              |
| pGenQ-LM_up     | ATCACGGCC <b>CATATG</b> CGGTACGGCCCGGAG  | <i>NdeI</i>    |
| pGenQ-VM_up     | CCCAACCCGG <b>CATATG</b> CTCATCAGCGTTTC  | <i>NdeI</i>    |
| pGenQ-dn        | TTGCCGGCACCC <b>GAATTC</b> GATGGTCATCGTG | <i>EcoRI</i>   |
| pGenB1-up       | AATCGAGCGAC <b>CATATG</b> ACCATCGACATCG  | <i>NdeI</i>    |
| pGenB1-dn       | AGGACCTGGTGG <b>GGATCC</b> ACAAGGAGTGAA  | <i>BamHI</i>   |
| pGenB2-up       | CGGAGGTTTCG <b>CATATG</b> ATTATTGCCAACG  | <i>NdeI</i>    |
| pGenB2-dn       | CGGCCCTGCC <b>GGATCC</b> GTCAGAGCTGAGC   | <i>BamHI</i>   |
| pGenB3-up       | TTG GGGATAG <b>CATATG</b> GCAGTCGCCGACCA | <i>NdeI</i>    |
| pGenB3-dn       | ATCTTCACCGGCCCTG <b>GAATTC</b> CTACGCC A | <i>EcoRI</i>   |
| pGenB4-up       | CGTGGTGGG <b>CATATG</b> AACTACCGTGAGTTG  | <i>NdeI</i>    |
| pGenB4-dn       | CGGCCCTCGAACCG <b>GAATTC</b> CTCAAGGTCA  | <i>EcoRI</i>   |

---

Primer pairs for amplification of left- or right-flanking fragments of a target gene, for PCR/sequencing confirmation, and for cloning target genes for over-expression are marked with suffixes -L1/-L2, -R1/-R2, CK1/CK2, or -up/-dn, respectively.

---



**Table S1, related to Figure 3. LC-HRMS analysis of *genB* knock-out mutants**

| Strain                                                      | Gentamicin C complex production ( $\times 10^5$ ) |     |      |      |      | Intermediates production ( $\times 10^5$ ) |        |       |        |
|-------------------------------------------------------------|---------------------------------------------------|-----|------|------|------|--------------------------------------------|--------|-------|--------|
|                                                             | C1a                                               | C2b | C2   | C2a  | C1   | X2                                         | JI-20A | G418  | JI-20B |
| wild type                                                   | 8.8                                               | 2.8 | 11.9 | 1.1  | 44.6 | 8.5                                        | 1.5    | 8.2   | 4.3    |
| $\Delta$ genB1                                              | 0.4                                               | 2.9 | 1.2  | 1.7  | 14.6 | 6.8                                        | 0.5    | 15.9  | 2.5    |
| $\Delta$ genB2                                              | 0.8                                               | 0.1 | ND   | 7.6  | ND   | 7.1                                        | 0.7    | 0.7   | 1.0    |
| $\Delta$ genB3                                              | ND                                                | ND  | ND   | ND   | ND   | 7.2                                        | 19.1   | 10.8  | 75.4   |
| $\Delta$ genB4                                              | ND                                                | ND  | ND   | ND   | ND   | 11.0                                       | 2.7    | 14.1  | 8.7    |
| $\Delta$ genB2 $\Delta$ genB3                               | ND                                                | ND  | ND   | ND   | ND   | 8.6                                        | 2.7    | 8.8   | 20.5   |
| $\Delta$ genB2 $\Delta$ genB4                               | ND                                                | ND  | ND   | ND   | ND   | 7.6                                        | 2.0    | 1.2   | 3.7    |
| $\Delta$ genB4 $\Delta$ genB1                               | ND                                                | ND  | ND   | ND   | ND   | 5.2                                        | 1.4    | 18.6  | 6.7    |
| $\Delta$ genB2 $\Delta$ genB1                               | 0.3                                               | 0.1 | ND   | 15.3 | ND   | 4.0                                        | 0.5    | 10.7  | 2.9    |
| $\Delta$ genB1 $\Delta$ genB3                               | ND                                                | ND  | ND   | ND   | ND   | 1.5                                        | 0.1    | 43.0  | 1.4    |
| $\Delta$ genB4 $\Delta$ genB3                               | ND                                                | ND  | ND   | ND   | ND   | 9.7                                        | 1.1    | 17.0  | 6.3    |
| $\Delta$ genB2 $\Delta$ genB3 $\Delta$ genB1                | ND                                                | ND  | ND   | ND   | ND   | 3.4                                        | 0.1    | 12.8  | 0.1    |
| $\Delta$ genB4 $\Delta$ genB1 $\Delta$ genB2                | ND                                                | ND  | ND   | ND   | ND   | 1.9                                        | 0.1    | 40.3  | 3.4    |
| $\Delta$ genB4 $\Delta$ genB1 $\Delta$ genB3                | ND                                                | ND  | ND   | ND   | ND   | 3.3                                        | 0.1    | 20.8  | 0.8    |
| $\Delta$ genB2 $\Delta$ genB4 $\Delta$ genB3                | ND                                                | ND  | ND   | ND   | ND   | 7.4                                        | 2.5    | 20.8  | 35.2   |
| $\Delta$ genB4 $\Delta$ genB1 $\Delta$ genB3 $\Delta$ genB2 | ND                                                | ND  | ND   | ND   | ND   | 2.3                                        | ND     | 142.0 | ND     |

**Table S2, related to Experimental Procedures. Plasmids used in this study**

| Plasmid       | Description                                                                                                            | Reference                                        |
|---------------|------------------------------------------------------------------------------------------------------------------------|--------------------------------------------------|
| pUC18         | Sub-cloning vector                                                                                                     | Sambrook and Maniatis                            |
| pET28a(+)     | Vector for protein expression                                                                                          | Invitrogen                                       |
| pIB139        | Site-specific integrative vector with <i>PermE*</i> promoter                                                           | Wilkinson et al., 2002; Del Vecchio et al., 2003 |
| pYH7          | <i>E. coil</i> - <i>Streptomyces</i> shuttle vector                                                                    | Sun et al., 2008                                 |
| pWHU77        | pIB139 derivative with Tsr <sup>R</sup>                                                                                | This study                                       |
| pYH286        | <i>genQ</i> in-frame deletion construct                                                                                | This study                                       |
| pWHU1         | <i>genK</i> in-frame deletion construct                                                                                | This study                                       |
| pWHU67        | $\Delta$ <i>genK</i> complementation construct containing <i>genK</i> under control of <i>PermE*</i> promoter          | This study                                       |
| pWHU163       | $\Delta$ <i>genQ</i> complementation construct containing <i>genQ</i> under control of <i>PermE*</i> promoter          | This study                                       |
| pWHU165       | $\Delta$ <i>genQ</i> complementation construct containing <i>neo11</i> under the control of the <i>PermE*</i> promoter | This study                                       |
| pWHU4         | <i>genB1</i> in-frame deletion construct                                                                               | This study                                       |
| pWHU2         | <i>genB2</i> in-frame deletion construct                                                                               | This study                                       |
| pWHU5         | <i>genB3</i> in-frame deletion construct                                                                               | This study                                       |
| pWHU3         | <i>genB4</i> in-frame deletion construct                                                                               | This study                                       |
| pWHU43        | <i>genB3</i> and <i>genB4</i> double in-frame deletion construct                                                       | This study                                       |
| pET28/LM_genQ | pET28a(+) vector with VM_ <i>genQ</i> gene insert                                                                      | This study                                       |
| pET28/VM_genQ | pET28a(+) vector with LM_ <i>genQ</i> gene insert                                                                      | This study                                       |
| pET28/genB1   | pET28a(+) vector with <i>genB1</i> gene insert                                                                         | This study                                       |
| pET28/genB2   | pET28a(+) vector with <i>genB2</i> gene insert                                                                         | This study                                       |
| pET28/genB3   | pET28a(+) vector with <i>genB3</i> gene insert                                                                         | This study                                       |
| pET28/genB4   | pET28a(+) vector with <i>genB4</i> gene insert                                                                         | This study                                       |

**Table S3, related to Experimental Procedures. In-frame deletion mutants and complemented strains used in this study**

| <b>Gene knockout mutant</b>                                 | <b>Parent strain</b>                         | <b>Plasmid used to achieve deletion</b> |
|-------------------------------------------------------------|----------------------------------------------|-----------------------------------------|
| $\Delta$ genK                                               | wild type                                    | pWHU1                                   |
| $\Delta$ genQ                                               | wild type                                    | pYH286                                  |
| $\Delta$ genQ $\Delta$ genK                                 | $\Delta$ genQ                                | pWHU1                                   |
| $\Delta$ genB1                                              | wild type                                    | pWHU4                                   |
| $\Delta$ genB2                                              | wild type                                    | pWHU2                                   |
| $\Delta$ genB3                                              | wild type                                    | pWHU5                                   |
| $\Delta$ genB4                                              | wild type                                    | pWHU3                                   |
| $\Delta$ genB2 $\Delta$ genB1                               | $\Delta$ genB2                               | pWHU4                                   |
| $\Delta$ genB1 $\Delta$ genB3                               | $\Delta$ genB1                               | pWHU5                                   |
| $\Delta$ genB4 $\Delta$ genB3                               | $\Delta$ genB4                               | pWHU43                                  |
| $\Delta$ genB2 $\Delta$ genB3                               | $\Delta$ genB2                               | pWHU5                                   |
| $\Delta$ genB2 $\Delta$ genB4                               | $\Delta$ genB2                               | pWHU3                                   |
| $\Delta$ genB4 $\Delta$ genB1                               | $\Delta$ genB4                               | pWHU4                                   |
| $\Delta$ genB4 $\Delta$ genB1 $\Delta$ genB2                | $\Delta$ genB4 $\Delta$ genB1                | pWHU2                                   |
| $\Delta$ genB4 $\Delta$ genB1 $\Delta$ genB3                | $\Delta$ genB4 $\Delta$ genB1                | pWHU43                                  |
| $\Delta$ genB2 $\Delta$ genB3 $\Delta$ genB1                | $\Delta$ genB2 $\Delta$ genB3                | pWHU4                                   |
| $\Delta$ genB2 $\Delta$ genB4 $\Delta$ genB3                | $\Delta$ genB2 $\Delta$ genB4                | pWHU43                                  |
| $\Delta$ genB4 $\Delta$ genB1 $\Delta$ genB3 $\Delta$ genB2 | $\Delta$ genB4 $\Delta$ genB1 $\Delta$ genB3 | pWHU2                                   |
| <b>Complemented mutant</b>                                  | <b>Parent strain</b>                         | <b>Plasmid for complementation</b>      |
| $\Delta$ genK:: <i>genK</i>                                 | $\Delta$ genK                                | <i>genK</i> gene in pWHU77              |
| $\Delta$ genQ:: <i>genQ</i>                                 | $\Delta$ genQ                                | <i>genQ</i> gene in pWHU77              |
| $\Delta$ genQ:: <i>neo11</i>                                | $\Delta$ genQ                                | <i>neo11</i> gene in pWHU77             |
